# 1 Introggression patterns between 2 house mouse subspecies and species 3 reveal genomic windows of frequent 4 exchange

5 Kristian Karsten Ullrich<sup>1</sup>, Miriam Linnenbrink<sup>1</sup>, Diethard Tautz<sup>1\*</sup>

\*For correspondence:  
[tautz@evolbio.mpg.de](mailto:tautz@evolbio.mpg.de) (DT)

6 <sup>1</sup>Max-Planck Institute for Evolutionary Biology, 24306 Plön, Germany

7  
8 **Abstract** Based on whole genome sequencing data, we have studied the patterns of  
9 introgression in a phylogenetically well defined set of populations, sub-species and species of mice  
10 (*Mus m. domesticus*, *Mus m. musculus*, *Mus m. castaneus* and *Mus spretus*). We find that many  
11 discrete genomic regions are subject to repeated and mutual introgression and exchange. The  
12 majority of these regions code for genes that are involved in parasite defense or genomic conflict.  
13 They include genes involved in adaptive immunity, such as the MHC region or antibody coding  
14 regions, but also genes involved in innate immune reactions of the epidermis. We find also clusters  
15 of KRAB zinc finger proteins that control the spread of transposable elements and genes that are  
16 involved in meiotic drive. These findings suggest that even well separated populations and species  
17 maintain the capacity to exchange genetic material in a special set of evolutionary active genes.

## 18 19 Introduction

20 Patterns of introgression are frequently observed between taxa that can still hybridize (*Green et al.,*  
21 *2010; Salazar et al., 2010; Song et al., 2011; Staubach et al., 2012; Hedrick, 2013; Liu et al., 2015;*  
22 *Zhang et al., 2016; Stukenbrock, 2016; Kumar et al., 2017*, and refs therein). The house mouse (*Mus*  
23 *musculus*) forms a species complex with several described and not yet fully described sub-species  
24 (*Guénet and Bonhomme, 2003; Phifer-Rixey and Nachman, 2015; Hardouin et al., 2015*) that are  
25 distributed in allopatric patterns across the whole world but can still hybridize, in particular at  
26 secondary contact zones (*Sage et al., 1986; Teeter et al., 2008; Janoušek et al., 2012; Turner and*  
27 *Harr, 2014*). The sister species *Mus spretus* lives in sympatry with *M. m. domesticus* in Western  
28 Europe and can form hybrids with this subspecies, but maintains its own species status. Patterns of  
29 introgression between the Western and Eastern house mouse (*M. m. domesticus* and *M. m. musculus*)  
30 have been intensively studied along the hybrid zone in Europe (*Teeter et al., 2008; Wang et al.,*  
31 *2011; Janoušek et al., 2015*). Genome-wide comparisons based on SNP array data have further  
32 revealed that introgression of haplotypes can also occur across large distances, possibly mediated  
33 through human transport of mice (*Staubach et al., 2012*). Since these introgressed haplotypes  
34 are much larger than the average linkage disequilibrium (LD) blocks in wild populations (*Laurie*  
35 *et al., 2007*), their spread in distant populations is apparently driven by positive selection, since  
36 they would rapidly break up under drift conditions (*Staubach et al., 2012*). A prominent example of  
37 an adaptive introgression of a *M. spretus* related haplotype into *M. m. musculus* populations is the  
38 locus that confers resistance to the rodenticide Warfarin, *Vkorc1* (*Song et al., 2011; Liu et al., 2015*).  
39 But haplotypes may also introgress between separated populations of the same subspecies, as it

40 has been shown for the MLV virus receptor *Xpr1* (*Hasenkamp et al., 2015*).

41 A variety of tests have been developed to trace introgression patterns and to distinguish them  
42 from incomplete lineage sorting (*Durand et al., 2011; Yu et al., 2012; Pease and Hahn, 2015; Martin*  
43 *et al., 2014*). While these have been assessed for their power to identify introgression, they have  
44 the disadvantage that they require relatively rigid assumptions about the assumed history of  
45 introgression between them. These model assumptions are violated when introgression occurs  
46 from non-sampled sources, or repeatedly between the taxa. While such more complex scenarios  
47 could potentially be integrated into more formalized models, this would increase vastly the number  
48 of test comparisons in the statistics. In fact, there is no simple solution for this problem, implying  
49 that the procedure used to trace introgression need to be somewhat adapted to the taxa and the  
50 question that one wants to ask.

51 We have used here a framework of mouse populations and outgroups for which the phylogenetic  
52 histories are well known, based on fossil and phylogeographic evidence (*Guénet and Bonhomme,*  
53 *2003; Phifer-Rixey and Nachman, 2015; Hardouin et al., 2015*). Figure 1 depicts these populations  
54 and their relationships.

55 Our focal *M. m. domesticus* populations come from France (Fra) and Germany (Ger). These  
56 are derived from a population from Iran (Ira), which invaded Western Europe about 3,000 years  
57 ago (*Cucchi et al., 2005; Hardouin et al., 2015*). The Fra and Ger populations have split shortly  
58 after arrival in Southern France and have since developed largely independently (*Ihle et al., 2006;*  
59 *Teschke et al., 2008; Staubach et al., 2012*). Hence, if a secondary introgression has occurred after  
60 the split, it should become visible in only one of the populations. While any population could serve  
61 as a source for secondary introgression, including the one from Ira (*Hasenkamp et al., 2015*), our  
62 focus in this study are the two subspecies *M. m. musculus* (MUS - represented by a population from  
63 Afghanistan) and *M. m. castaneus* (CAS - represented by a population from India), as well as the  
64 species *M. spretus* (SPRE - represented by a population from Spain) as possible source populations.

65 To study introgression, we use full genome sequence information and a branch-length compari-  
66 son approach (Figure 1). This approach allows to detect the most prominent regions of unequivocal  
67 introgression. We first applied it to a previously identified introgression event at the amylase gene  
68 cluster and provide evidence that the introgression is likely related to a rescue of a pseudogenized  
69 *Amy2b* allele. However, we noticed also that the introgression region as a whole has a much more  
70 complex history. By assessing the whole genome for similar patterns, we found that regions exist  
71 that are subject to apparent mutual introgression and haplotype exchange between the hybridizing  
72 taxa. Most notably, many of these regions code for loci involved in adaptive and innate immune  
73 defense, in the defense against transposable elements and some appear to be involved in meiotic  
74 drive. Several affect parts of the olfactory and vomeronasal receptor clusters. Many, but not all are  
75 in regions of gene clusters with copy number variation. These findings suggest that mechanisms  
76 exist that allow the frequent exchange of genes involved in frequent adaptive processes between  
77 the taxa, even though most of them are regionally separated and/or hybrids are sub-fertile.

## 78 Results

79 We have previously generated genomic re-sequencing data for multiple individuals for each of our  
80 focal populations (*Harr et al., 2016*). We have used these reads and created a consensus sequence  
81 representative for each population. This was done to ensure that only haplotypes with a frequency  
82 higher than 0.5 are represented. Hence, we are tracing introgression patterns that are either on the  
83 way to fixation or fixed. Our previous study (*Staubach et al., 2012*) had shown that the majority of  
84 recently introgressed haplotypes segregate only at low frequency, hence by focusing on the high  
85 frequency variants in the present study, we are tracing genomic introgression regions that have  
86 most likely been subject to recent positive selection in the respective populations (see modeling in  
87 *Staubach et al. (2012)*).

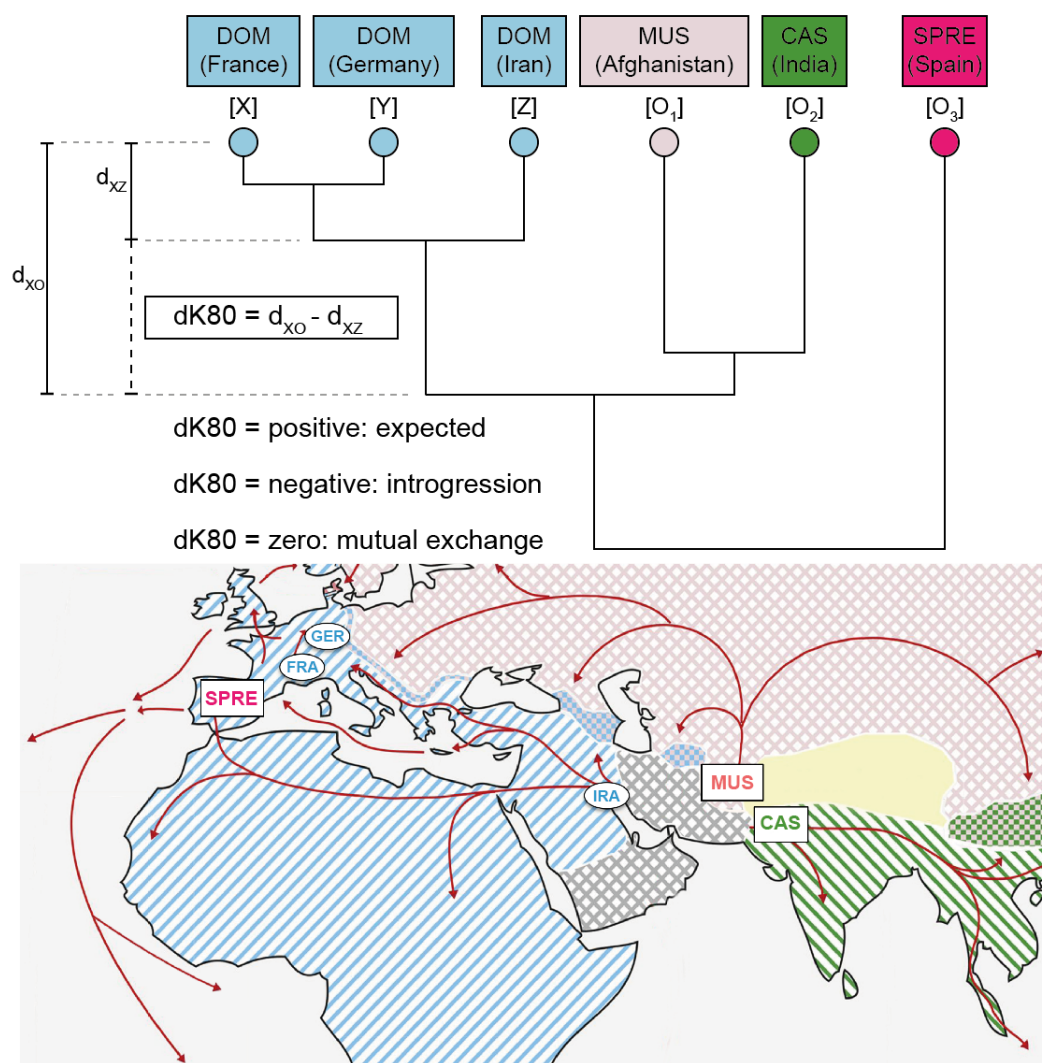

**Figure 1. Relationships and origins of the mouse populations in the study.** Three populations represent *M. m. domesticus* (DOM) (from France = Fra, Germany = Ger and Iran = Ira), the population from Afghanistan represents *M. m. musculus* (MUS), the one from India *M. m. castaneus* (CAS) and the one from Spain *M. spretus* (SPRE). The map shows the approximate locations, as well as the known dispersal routes (picture modified from *Harr et al. (2016)*). The tree represents the relationships. The principle of calculating dK80 is depicted to the left for one particular example, namely the comparison of the distance between Fra-Ira with the one between Fra-MUS, whereby Ira is the in-group [Z] and MUS the out-group [O<sub>1</sub>]. The two alternative outgroups used in this study are CAS [O<sub>2</sub>] and SPRE [O<sub>3</sub>].

**Figure 1-Figure supplement 1. dK80 q-q plots for different population combinations.** (A) [X]: Fra [Z]: IRA [O<sub>1</sub>]: AFG, (B) [Y]: Ger [Z]: IRA [O<sub>1</sub>]: AFG, (C) [X]: Fra [Z]: IRA [O<sub>2</sub>]: CAS, (D) [Y]: Ger [Z]: IRA [O<sub>2</sub>]: CAS, (E) [X]: Fra [Z]: IRA [O<sub>3</sub>]: SPRE, (F) [Y]: Ger [Z]: IRA [O<sub>3</sub>]: SPRE. Mean of dK80 distribution is highlighted as solid lines (black: simulated data; grey: real data), 3.89 standard deviations are highlighted by dashed lines (red: simulated data; orange: real data).

**Figure 1-Figure supplement 2. Preview of supplementary Table 1.** dK80 values for all genomic 25kb windows for the quartet [X]: Fra [Y]: Ger [Z]: Ira [O<sub>1</sub>]: AFG.

**Figure 1-Figure supplement 3. Preview of supplementary Table 2.** dK80 values for all genomic 25kb windows for the quartet [X]: Fra [Y]: Ger [Z]: Ira [O<sub>1</sub>]: CAS.

**Figure 1-Figure supplement 4. Preview of supplementary Table 3.** dK80 values for all genomic 25kb windows for the quartet [X]: Fra [Y]: Ger [Z]: Ira [O<sub>1</sub>]: SPRE.

**Figure 1-Figure supplement 5. Preview of supplementary Table 4.** Lists of outlier windows for the three quartet comparisons.

**Figure 1-Figure supplement 6. Scheme of the simulation approach.** Taking the mm10 reference sequence (yellow) as a start point, genomes were constructed in a phylogenetic context mimicking the real data including the construction of a 'new' reference (orange). Nucleotides were randomly altered given a percentage divergence value including ancestral states (grey). The resulting distances represents the phylogenetic context obtained as described in the method section.

## 88 Population-specific introgression patterns

89 To identify genomic regions of introgression, we used a sliding window approach (25kb per window)  
 90 and generated a phylogenetic tree for each window. Linkage disequilibrium drops fast within 20kb  
 91 in wild populations (*Laurie et al., 2007; Staubach et al., 2012*), i.e. by focusing on 25kb window sizes,  
 92 we trace mostly relatively recent events that have not been subject to much recombination. We  
 93 noticed that tree lengths can vary considerably along the chromosomes, which makes a simple dxy  
 94 analysis for tracing tree incongruence as indicators of introgression less suitable. To compensate  
 95 for this, we use the subtraction measure deltaK80 (dK80) depicted in Figure 1. The trees serve to  
 96 calculate dK80 by subtracting the distance of the focal groups (either Fra or Ger) to the founder  
 97 population (Ira) from the respective distances to the tested outgroups (MUS, CAS or SPRE). dK80  
 98 is expected to be positive when no introgression has occurred and negative when introgression  
 99 from the tested outgroup has occurred. Based on simulations of our tree configuration without  
 100 introgression, we find that dK80 values have a normal distribution (see q-q plots in Figure 1 - figure  
 101 supplement 1).

102 The data for the dK80 values are provided in suppl. Table 1 (comparisons with MUS as outgroup  
 103 [ $O_1$ ]), suppl. Table 2 (comparisons with CAS as outgroup [ $O_2$ ]) and suppl. Table 3 (comparisons with  
 104 SPRE as outgroup [ $O_3$ ]). We have also plotted these actual data distributions in q-q plots and find  
 105 that they are less dispersed and more skewed than the ones of the simulations (suppl. Figure 1).  
 106 Interestingly, the skews occur not only in the negative direction, but also in the positive one. In the  
 107 following we focus the analysis on the negative side and come back to the skew on the positive side  
 108 in the discussion.

109 dK80 values can be easily visualized as genome browser tracks allowing to recognize even  
 110 complex patterns of introgression (see below). We have generated a custom track set on the UCSC  
 111 genome browser named "wildmouse-introgression" that includes all data discussed here. Examples  
 112 of these tracks are in the figures below.

113 We surveyed all negative outlier windows beyond a cutoff of 0.01% of the distribution of the  
 114 real data (3.89 SD). Since about 100,000 windows were surveyed, one would expect around 5 by  
 115 chance in a normal distribution, but we find between 99 to 352 in the different comparisons per  
 116 population (Table 1; genome positions in suppl. Table 4).

**Table 1. dK80 averages and outliers in the populations.**

|                                          | tested outgroup population |         |         |
|------------------------------------------|----------------------------|---------|---------|
|                                          | MUS                        | CAS     | SPRE    |
| windows (N)                              | 102,281                    | 102,299 | 102,009 |
| dK80 average (x103)                      | 6.08                       | 4.15    | 14.94   |
| dK80 StDEV (x103)                        | 3.54                       | 2.97    | 4.22    |
| 0.01% cutoff (x103)                      | -7.69                      | -7.40   | -1.50   |
| smallest dK80 (x103)                     | -55.07                     | -56.17  | -45.53  |
| windows (N) smaller than cutoff at 0.01% |                            |         |         |
| total in Fra                             | 114                        | 115     | 282     |
| total in Ger                             | 99                         | 134     | 352     |
| total in Fra and Ger                     | 55                         | 65      | 178     |
| only in Fra                              | 59                         | 50      | 104     |
| only in Ger                              | 44                         | 69      | 174     |

117 Among these we find between 55 - 178 in both, the Fra and the Ger population. This can  
 118 be interpreted either that both populations were introgressed, possibly already in their direct  
 119 colonizing ancestor, or that the Ira population has itself become introgressed from an unknown  
 120 source after splitting from the ancestor of the Western European populations. Note that there

121 are several further mouse lineages as potential donors in Iran that have not been characterized in  
 122 detail yet (*Hardouin et al., 2015*). We have inspected the regions including outlier windows in the  
 123 genome browser tracks and found that they represent often complex patterns of introgression. We  
 124 first focus on a region coding for amylase genes.

### 125 **Amylase 2b introgression**

126 We had previously identified the region around the pancreas Amylase 2b (*Amy2b*) as having been  
 127 subject to adaptive introgression in the Fra population (*Staubach et al., 2012*). The dK80 approach  
 128 and the outlier windows identify the same region, but the better resolution available through the full  
 129 genome sequences allows now a much more detailed picture (Figure 2). The overall introgression  
 130 (i.e. negative dK80 values) from *M. m. musculus* into Fra is as broad as originally found (approx.  
 131 0.5Mb), but the corresponding track lines for introgression from *M. m. castaneus* and *M. spretus*  
 132 are more complex. A particularly strong introgression signal for all three outgroups, identified by  
 133 outlier windows (Figure 2, bottom tracks), covers part of the non-coding region between *Amy2b* and  
 134 its duplicated paralogs (Figure 2). Hence, the historical introgression dynamics at this locus appears  
 135 to have been much more complex than originally anticipated. Note that there are also complex  
 136 introgression patterns in the neighboring *Amy1a* gene (see data tracks "wildmouse-introgression")  
 137 that are not further discussed here.

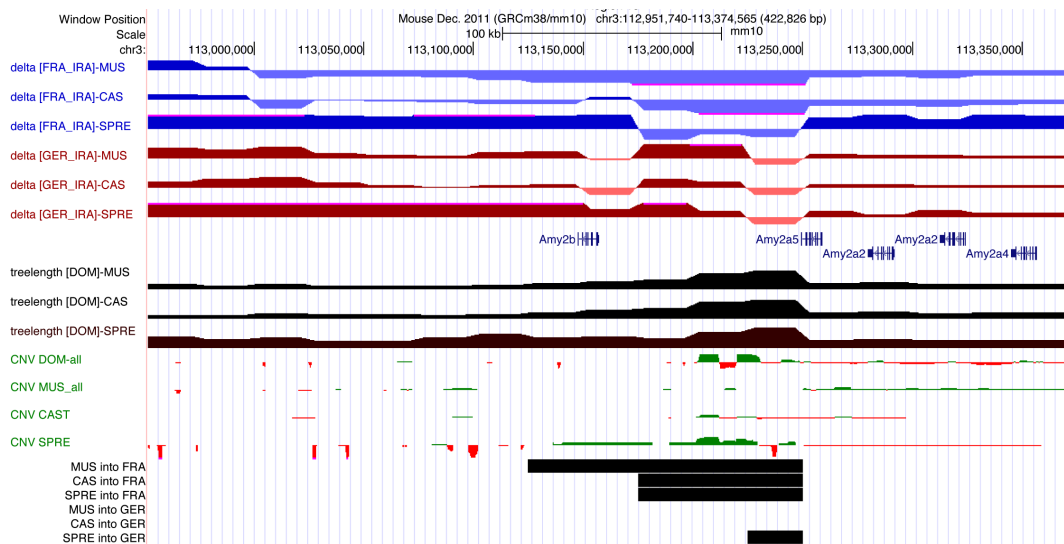

**Figure 2. Introgression patterns around the amylase 2 gene cluster.** Depiction of UCSC browser tracks for a region of chromosome 3 (positions in header). The rows show from top to bottom: the tracks for the dK80 values for the FRA comparisons (blue/magenta) and the GER comparisons (brown/red); gene annotations from the "UCSC Genes" track implemented in the UCSC Mouse Genome Browser (GRCm38/mm10); tree length tracks for the three outgroup comparisons (black); copy number variation tracks summed across all individuals of the respective populations, taken from *Pezer et al. (2015)* (green is more copies than reference, red is fewer copies than reference); windows with significant introgression in the indicated directions.

138 Interestingly, the sequence analysis provides a hint towards the possible reason for the appar-  
 139 ently very recent introgression of a *M. m. musculus* haplotype into Fra. All of the Ger individuals  
 140 sequenced harbor a mutation in the first exon that leads to a premature stop codon (Figure 3A).  
 141 Hence, the Ger individuals carry a pseudogene for *Amy2b*. We have typed this variant for an  
 142 extended sample of animals and populations and find the pseudogene variant to be prevalent in  
 143 Germany, but rare in France (Figure 3b). The *Amy2b* sequences of the eight fully sequenced animals  
 144 from Fra are all very similar and cluster closely with the *M. m. musculus* consensus sequence (Figure  
 145 3c). A native gel electrophoresis from pancreas tissue shows that there are still amylase variants  
 146 in the Ger individuals, but the band patterns shows a composite between those found in the Fra  
 147 animals and in *M. m. musculus* / *M. m. castaneus* animals. These are most likely derived from

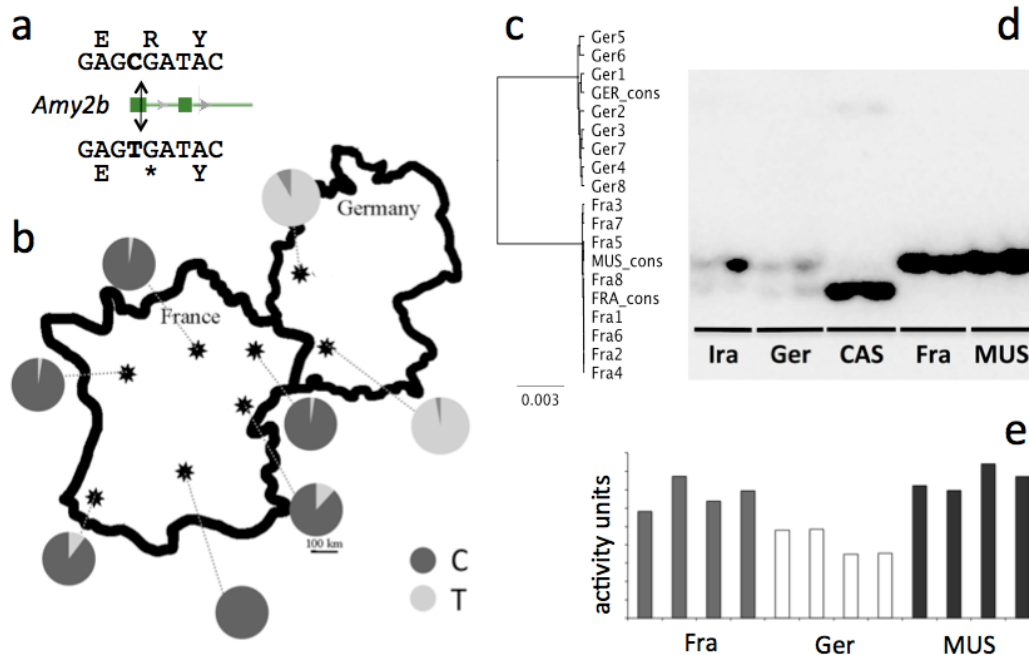

**Figure 3. *Amy2b* introgression patterns.** (a) Depiction of of the disabling mutation in exon1 of *Amy2b*. (b) Frequencies of the disabling (T-allele) versus enabling (C-allele) in different populations in France and Germany. (c) Phylogeny of *Amy2b* alleles of individuals and consensus sequences of the Fra and Ger population, plus consensus sequence of the MUS population. (d) Westernblot from a native gel of pancreas samples of two animals each of five populations, stained with an *Amy2b* antibody. Note that a denaturing gel does not resolve these variants (data not shown). (e) Amylase activity assays of four animals each from the three indicated populations.

158 The case of the *Amy2b* introgression presents thus a model of how one can envisage adaptive  
 159 introgression taking place. An allele that has an advantage, either because it has itself acquired a  
 160 new adaptation in a source population, or because it replaces a slightly deleterious mutation in the  
 161 receiving population can apparently be specifically acquired, even from distant populations and can  
 162 then reach high frequencies in the receiving population.

### 163 Genomic introgression windows

164 The complexity of the introgression pattern shown in Figure 2 suggests that a region subject to  
 165 introgression may actually be invaded repeatedly from different sources. If this would happen  
 166 frequently, one would expect that dK80 would assume values around zero because the mutual  
 167 invasions would equilibrate the distances between the respective groups.

168 We have therefore sought to systematically identify regions of such repeated introgression.  
 169 However, because of the complexity of the possible patterns, they can not be easily captured by  
 170 general statistical criteria. But the regions can readily be identified when one inspects the dK80  
 171 browser tracks. Since most of the genome follows the expected distribution of dK80 values, individ-

172 ual introgression regions become visible as noticeable dips in this background. Figure 4 shows two  
 173 examples of 10MB windows from chromosome 12 and chromosome 17. The chromosome 12 region  
 174 includes an approximately 2Mb window with a complex mixture of strong introgression (identified  
 175 by outlier windows) and flat distributions. The region codes for the mouse immunoglobulin heavy  
 176 gene genes (*Igh*) encoding the exons that make up the variable antibody parts. In fact, another such  
 177 region on chromosome 6 shows a similar pattern (see below). The chromosome 17 region includes  
 178 an approximately 5Mb region that is relatively flat for comparisons between the sub-species *M. m.*  
 179 *musculus* and *M. m. castaneus*, plus two shorter dips where also the comparison with *M. spretus*  
 180 shows introgression, including significant outlier windows. These are enlarged at the bottom of  
 181 Figure 4 and show that they code for key genes of the major histocompatibility complex (MHC),  
 182 namely the antigen fragment binding receptors *H2-A*, *H2-B*, *H2-O* and *H2-Q*. Transspecies alleles  
 183 have been described for *H2-A* and *H2-B* genes before, supporting the notion that our procedure  
 184 picks out such introgression regions faithfully.

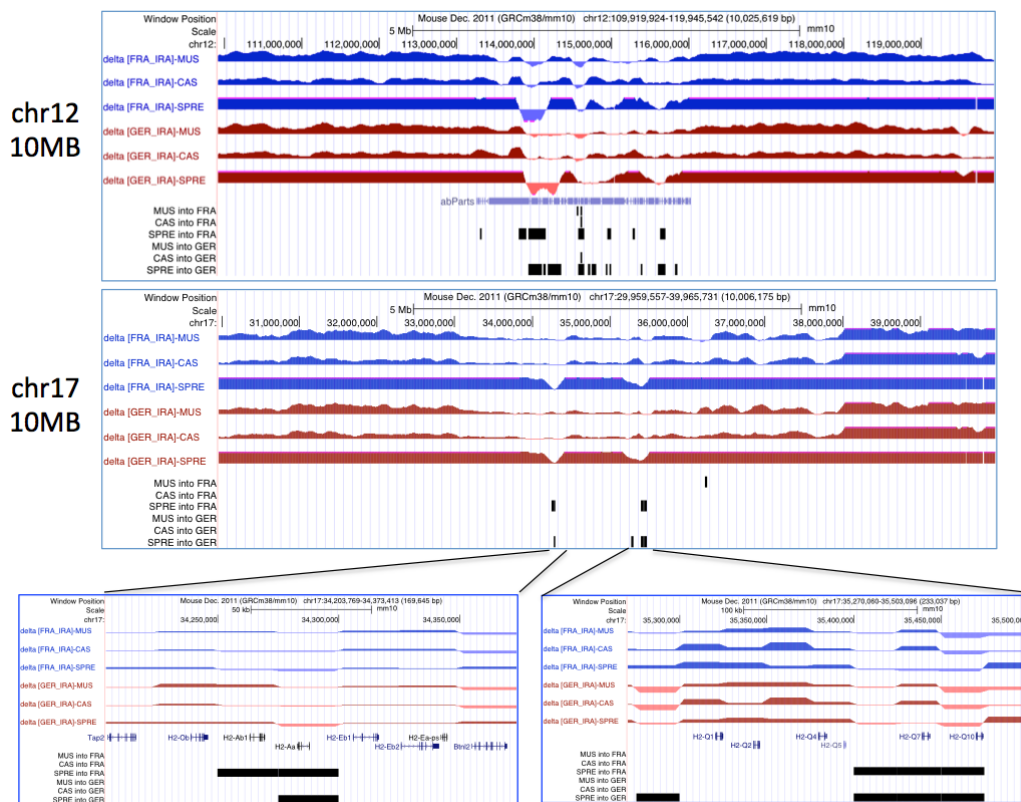

**Figure 4. Two examples of mutual introgression windows.** Depiction of UCSC browser tracks for 10MB regions of chromosome 12 and chromosome 17 (positions in headers). The rows show from top to bottom: the tracks for the dK80 values for the FRA comparisons (blue/magenta) and the GER comparisons (brown/red); gene annotations from the "UCSC Genes" track implemented in the UCSC Mouse Genome Browser (GRCm38/mm10); windows with significant introgression in the indicated directions.

**Figure 4-Figure supplement 1. Collection of screen shots of browser windows for all mutual introgression regions listed in Table 2.** For full track description see legend of Figure 2.

**Figure 4-Figure supplement 2. Neighbor-joining (NJ) tree comparisons with consensus sequences in extreme introgression regions.** (A) Region 11 from Table 2 (tree constructed for chr11:71,150,213-71,301,792) including *Nlrp1b*. (B) Region 7 from Table 2 (tree constructed for chr4:41,807,517-42,760,683) including a chemokine ligand cluster. (C) Standard tree structure represented by a tree of whole chr19. NJ (*Saitou and Nei, 1987*) trees based on pair-wise K80 distances (*Kimura, 1980*) with the R ape package (*Paradis et al., 2004*). Prior the NJ tree calculation all masked sites were removed from all included sequences.

**Figure 4-Figure supplement 3. Preview of suppl. Table 5.** This table represents an extended version of Table 2 including all identified introgression regions between subspecies and species, as well as the respective genomic locations.

185 We have inspected all 10MB windows across the whole genome (excluding the Y-chromosome

186 because of too many missing data) to identify a set of windows that show unusual patterns across  
 187 all three outgroup comparisons. Table 2 lists all of these regions with a length of at least 100kb  
 188 (i.e. 4 consecutive windows). The majority (12 out of 18) have well defined functions in adaptive  
 189 immunity (5), innate immunity (7) and three represent KRAB Zn-finger genes which function in the  
 190 repression of transposable elements (*Jacobs et al., 2014; Imbeault et al., 2017; Kauzlaric et al.,*  
 191 *2017*). Two cover parts of olfactory receptor gene clusters whereby region 9 includes besides an  
 192 olfactory receptor cluster also the hemoglobin beta-chain genes, which are known to be subject to  
 193 complex selection and gene replacement in mouse (*Storz et al., 2007*). The track patterns for the  
 194 18 regions listed in Table 2 are compiled in Figure 4-Figure supplement 1.

**Table 2. Introgression between all in-groups and out-groups.** #chromosomal genome positions are provided in Figure 4-Figure supplement 3; dK80 and tree length represent averages x1000; "immunity" is classified into three categories: "adaptive" = adaptive immunity, "innate" = innate immunity and "transposons" = transposon repression

| region | chr   | size (Mb) | dK80  | tree length | annotated coding genes                         | general classification | comments                                                            |
|--------|-------|-----------|-------|-------------|------------------------------------------------|------------------------|---------------------------------------------------------------------|
| 1      | chr1  | 0.7       | 2.2   | 4.0         | Csprs, Sp110, Sp140                            | immunity (innate)      | SP110 is involved in inflammation and resistance to tuberculosis    |
| 2      | chr1  | 0.3       | -1.8  | 19.6        | Ifi204, Mndal, Ifi203, Ifi202b, Ifi205         | immunity (innate)      | interferon inducible genes                                          |
| 3      | chr1  | 0.17      | -4.0  | 26.1        | Olfr gene cluster                              | sensory                | olfactory receptor genes                                            |
| 4      | chr2  | 0.11      | -0.2  | 19.4        | Ttpal, Serinc3                                 | immunity (innate)      | Serinc3 involved in defense response against viruses                |
| 5      | chr2  | 2.08      | -0.4  | 3.0         | KRAB zinc finger protein cluster               | immunity (transposons) | repression of transposable elements                                 |
| 6      | chr4  | 2.28      | -2.1  | 27.0        | Skint gene cluster                             | immunity (adaptive)    | required for intraepithelial T cell development                     |
| 7      | chr4  | 0.95      | 0.1   | 1.2         | Ccl - chemokine ligand gene cluster            | immunity (adaptive)    | chemotactic factors attracting skin-associated memory T-lymphocytes |
| 8      | chr6  | 2.47      | 2.5   | 17.8        | abParts                                        | immunity (adaptive)    | parts of antibodies, mostly variable regions                        |
| 9      | chr7  | 0.49      | -4.4  | 19.3        | Olfr receptor cluster, Hbb genes               | sensory                | olfactory receptor genes; hemoglobin beta genes                     |
| 10     | chr8  | 0.12      | -1.7  | 27.7        | Defb8                                          | immunity (innate)      | innate immune response                                              |
| 11     | chr11 | 0.15      | -36.4 | 59.5        | Nlrp1b                                         | immunity (innate)      | sensor component of the NLRP1 inflammasome                          |
| 12     | chr12 | 1.84      | 1.2   | 20.5        | abParts                                        | immunity (adaptive)    | parts of antibodies, mostly variable regions                        |
| 13     | chr12 | 1.2       | 0.7   | 3.3         | KRAB zinc finger protein                       | immunity (transposons) | repression of transposable elements                                 |
| 14     | chr12 | 2.73      | 1.2   | 4.9         | 9030624G23Rik                                  | unknown                | KRAB-A box protein; unknown function                                |
| 15     | chr13 | 1.66      | 1.4   | 9.6         | KRAB zinc finger protein                       | immunity (transposons) | repression of transposable elements                                 |
| 16     | chr14 | 0.42      | -0.7  | 21.9        | Ear gene family                                | immunity (innate)      | involved in virus defense                                           |
| 17     | chr16 | 0.12      | -5.2  | 26.2        | Cd200r genes                                   | immunity (innate)      | regulation of inflammation response                                 |
| 18     | chr17 | 0.17      | 0.4   | 11.6        | Tap2, H2-Ob, H2-Ab, H2-Aa, H2-Eb, H2-Ea, Btl2l | immunity (adaptive)    | MHC core region coding for antigen fragment binding receptors       |

195 In addition to the regions involving mutual introgression with *M. spretus*, we have also systemati-  
 196 cally surveyed all regions >100kb that involve mostly exchange between the three sub-species (*M.*  
 197 *m. domesticus*, *M. m. musculus* and *M. m. castaneus*) by the same criteria. These include a total of 67  
 198 regions (suppl. Table 5), including the overlaps with the ones listed in Table 2. 29 of the regions  
 199 have clear immune functions, eight represent olfactory and vomeronasal receptor clusters and  
 200 another eight represent testis specific genes, or genes highly expressed in testis. Six regions each  
 201 cover non-coding parts of the genome (i.e. no annotations in the respective window) and genes  
 202 with unknown functions (suppl. Table 5).

203 Inspection of the windows shows that tree lengths differ much in the different regions. Some  
 204 introgression regions have very long trees, others very short ones (Table 2 and suppl. Table 5). On  
 205 average, there is a good correlation between tree length and dK80 score ( $r^2 = 0.69$  for the data in  
 206 Table 2 and 0.45 for the data in suppl. Table 5), with more negative scores showing the longer trees.  
 207 The most negative score combined with the longest average tree is found for *Nlrp1b*, which codes  
 208 for the sensor component of the inflammasome (region 11 in Table 2). This pattern is apparently  
 209 caused by an introgression of a highly unrelated haplotype into the Ira population (tree in Figure  
 210 4-supplement 2), which renders all other comparisons negative. The shortest average tree length  
 211 is found for the window coding for a chemokine ligand cluster (region 7 in Table 2), rendering  
 212 this 0.92Mb region highly similar between all analyzed taxa (tree in Figure 4-supplement 2). This  
 213 suggests that a given haplotype variant has introgressed into all of them, possibly located on an  
 214 inversion, since the size appears to be the same in all taxa.

215 The gene clusters identified within the windows show often copy number variation (see suppl.  
 216 Figure 4-Figure supplement 1). Of the three single genes with major copy number variation in  
 217 natural populations identified in *Pezer et al. (2015)*, two show patterns of introgression. One is  
 218 *Cwc22*, which encodes a splicing factor. Its introgression pattern is apparent in the comparison with  
 219 CAS and SPRE (Figure 5a). The other is *Hjurp*, which codes for a holiday junction recognition protein.  
 220 For this gene, introgression is mostly evident for the Ger population with respect to MUS and CAS



221 introgression (Figure 5b).

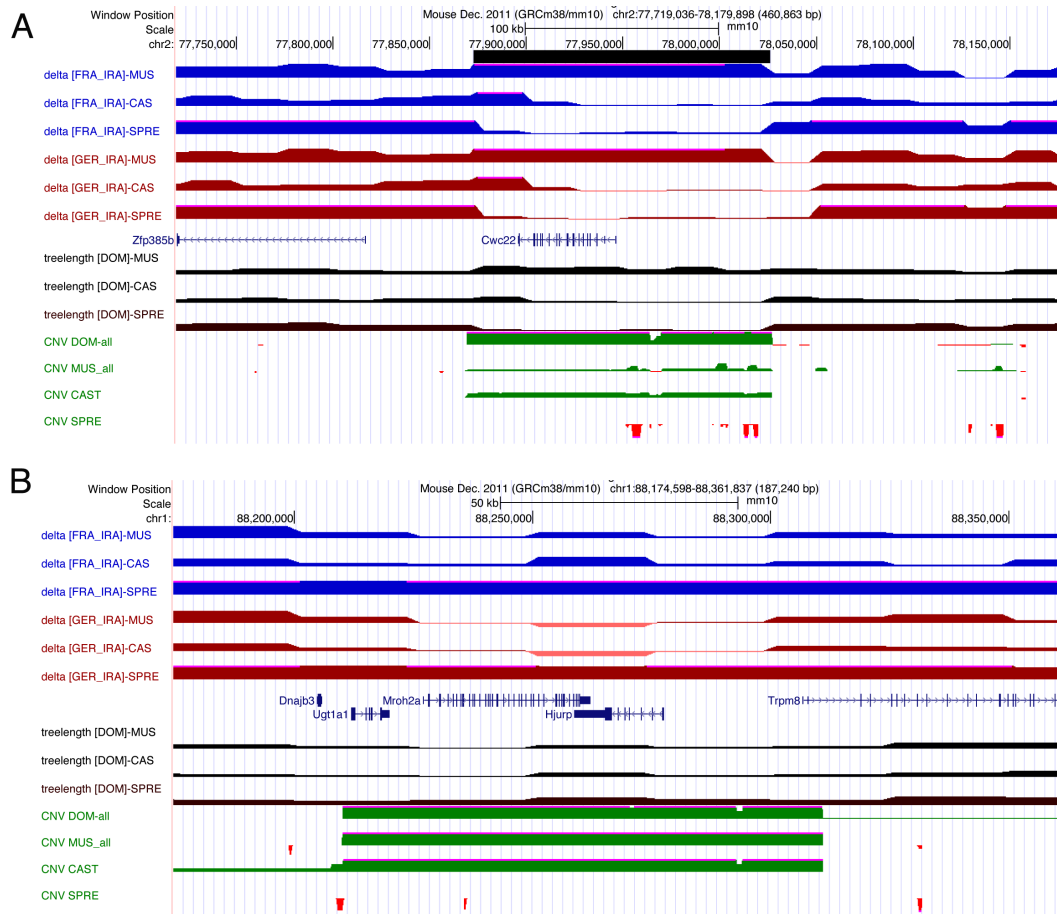

**Figure 5. Introgression patterns in highly copy number variable regions.** Depiction of UCSC browser tracks for chromosomal regions of *Cwc22* (A) and *Hjurp* (B) (positions in headers). Rows from top to bottom as in Figure 2. *Cwc22* and *Hjurp* were previously found to be among the most copy number variable genes between mouse populations (Pezer et al. 2015). *Cwc22* shows introgression in comparison to *M. m. castaneus* and *M. spretus*, for *Hjurp*, the pattern is most evident for the comparison to *M. m. musculus* and *M. m. castaneus* in the Ger population.

## 222 Discussion

223 Our initial data analysis was geared towards identifying specific regions of introgression in popula-  
 224 tions that have established only a few thousand years ago (Fra and Ger). One such region that we  
 225 had identified before is a region on chromosome 3 coding for an amylase gene cluster. Here we  
 226 confirmed this region, based on a procedure specifically developed to identify regions of potentially  
 227 adaptive introgression. In the case of the amylase region, we show that a secondary replacement  
 228 of pseudogenized version of *Amy2b* was apparently the reason for the introgression in one of the  
 229 *M. m. domesticus* sub-populations. However, our analysis revealed that the patterns are much  
 230 more complex. There are apparently many regions in the genome that are subject to repeated  
 231 introgression in different directions, with apparently different histories, and including haplotypes  
 232 from sources that have not been sampled. Given the abundant evidence for introgression in many  
 233 studies, this should not be so surprising. In fact, this complexity makes average genome-wide  
 234 statistical analyses complicated, since these can only work within the framework of given scenarios  
 235 and do not account for repeated or mutual introgression. Our study has initially also focused  
 236 onto a particular scenario, namely introgression into newly established populations from other  
 237 sub-species and species. But the fact that many of the outlier windows identified through this

238 procedure overlap and cluster in specific regions revealed an underlying complexity that could  
239 eventually only be resolved through direct inspection of introgression patterns.

240 By using consensus sequences from the populations, our approach is conservative, since we  
241 miss out cases where an introgressing haplotype is still at a frequency below 50%. This is for  
242 example the case for the otherwise well supported *Vkorc1* region that was suggested to be in a  
243 phase of adaptive introgression in some Western European populations (*Song et al., 2011; Liu et al.,*  
244 *2014*). In our data, we find only a subset of animals in the Fra and Ger populations carrying this  
245 haplotype, i.e. it does not show up among the consensus sequences.

246 Our focus was on low or negative dK80 values, since these would indicate introgression within  
247 our general tree topology. However, the q-q plots in Figure 1-Figure supplement 1 show that  
248 deviations from the expected distributions occur also at high dK80 values. We have inspected  
249 these outliers and find that they represent another level of complexity, such as introgression into  
250 the outgroup population from unknown sources, making the distances much larger than average.  
251 It is known that there are further sub-species or species in Asia (*Hardouin et al., 2015; Hamid*  
252 *et al., 2017*) that could be the source for such introgression. Given our general finding of mutual  
253 introgression among our sampled populations, it is not unexpected that this should also occur with  
254 non-sampled populations.

### 255 **Introgression in evolutionary active regions**

256 The inspection of the dK80 tracks across the whole genome and across the different populations  
257 allowed to pinpoint regions of particularly active introgression. Intriguingly, the majority of these  
258 regions is related to adaptive and innate immune functions. This includes the MHC, where trans-  
259 species alleles are often found (*Parham et al., 1996*). These have usually been ascribed to be the  
260 result of balancing selection and/or incomplete lineage sorting after the splitting of the species.  
261 However, for species that have remained at least partially inter-fertile, there is increasing evidence  
262 that introgression must play a role as well (*Abi-Rached et al., 2011; Grossen et al., 2014*). This is  
263 now fully confirmed in our study. Key genes of the core MHC region, including H2-Aa, H2-Ab, H2-Ea  
264 and H2-Eb show significant introgression windows for the comparisons with *M. spretus*. Further, an  
265 extended 2.9Mb region shows a flat dK80 pattern for the comparisons with the subspecies (Figure  
266 2). These regions are too long to be considered as remnants from the progenitor populations  
267 maintained by balancing selection, since they would have been broken up by recombination.  
268 Interestingly, in spite of the apparent frequent introgression, at least the loci coding for the H2-Aa,  
269 H2-Ab receptors show long trees, which is compatible with balancing selection in this region to  
270 maintain a high diversity, which may even be fueled by capturing alleles from other sub-species  
271 and species.

272 While the introgression pattern within the MHC is not unexpected, it had remained so far  
273 unnoticed that many other immune genes are also subject to introgression. Most notably, these  
274 encode the antibody coding regions on chromosomes 6 and 12, which are also part of the adaptive  
275 immune system. Since the antibody diversity is generated through splicing among variable exons, it  
276 seems that this diversity is also enhanced by taking up alleles from other populations.

277 Another immune region with strong introgression and long trees is the *Skint* gene family cluster  
278 on chromosome 4 (region 6 in Table 2). *Skints* code for proteins containing trans membrane  
279 spanning domains and extracellular IgV and IgC domains that are specifically expressed in dendritic  
280 epidermal T-cells which play a crucial role in immune defense during wound healing (*Keyes et al.,*  
281 *2016*). Interestingly, a second introgression region on chromosome 4 (region 7 in Table 2) codes for  
282 a cluster of cytokine genes including *CCL27*, which has been shown to selectively recruit cutaneous  
283 memory T lymphocytes into the skin (*Morales et al., 1999*) and is generally implicated in regulating  
284 wound repair (*Hocking, 2015*). This region shows, however, a very flat signature, both for dK80,  
285 as well as for tree length, indicating mutual introgression or a recent sweep of a whole haplotype  
286 across the tested species and sub-species (Figure 4-Figure supplement 2). A third introgression  
287 region associated with epidermis is the one that encodes the *Defb8* gene (region 10 in Table 2).

288  $\beta$ -defensins code for antimicrobial and chemo-attractant peptides, especially attracting CD4+ T-cells  
289 (Taylor et al., 2009) and high expression of *Defb8* occurs in epidermal tissues.

290 Three introgression regions (region 1, 11 and 17 in Table 2) are involved in inflammation  
291 regulation. This includes the *SP110* gene that is involved in resistance to tuberculosis (Wu et al.,  
292 2016), *Nlrp1b*, a sensor component of the inflammasome (Chavarría-Smith and Vance, 2015) and  
293 *CD200r* genes regulate macrophage function in inflammation reactions (Snelgrove et al., 2008;  
294 Fraser et al., 2016).

295 Another three regions code for genes that are interferon inducible and/or involved in virus  
296 defense. These include a cluster of interferon inducible genes on chromosome 1 that function in  
297 virus recognition (*Iffi203* - region 2) (Stavrou et al., 2015), activity against retroviruses (*Serinc3* - region  
298 4) (Usami et al., 2015) and influenza virus protection in epithelia (*Ear1* - region 16) (O'Reilly et al.,  
299 2012). The fact that all of these regions are similarly, or even more strongly affected by introgression  
300 than the MHC genes suggests that they play a similar major role in counteracting fast evolving  
301 pathogens. Hence, the current focus on MHC genes as the major driver of evolutionary responses to  
302 pathogens may be too limited. It seems warranted to pay additional attention to immune processes  
303 in the epithelial cells, as well as innate mechanisms of virus defense. Differences in innate immune  
304 responses in human populations have also been ascribed to adaptive introgression of Neandertal  
305 alleles (Quach et al., 2016).

306 Immunity is not only relevant against pathogens, but also against transposable elements. KRAB  
307 zinc finger proteins have been implicated in this function, whereby there is an evolutionary arms  
308 race between adaptation of the zinc fingers to the recognition sites in the transposable elements  
309 and the acquisition of new mutations in the recognition sites (Jacobs et al., 2014). We find a total of  
310 four clusters of such genes plus a single gene one among the introgression regions (suppl. Table 4).  
311 One of them (region 13 - Table 2) covers a 2Mb region with almost identical sequences between  
312 all taxa (i.e. very short trees). In fact, one should expect that active transposable elements could  
313 introgress as well between the taxa, i.e. it makes sense when they share the same set of defense  
314 genes.

315 The extended table with introgression regions that show a signal with only two of the three  
316 outgroups (suppl. Table 5) provides some further interesting insights into the type of processes  
317 affected most by introgression in mice. There are six regions that code for olfactory receptor clusters,  
318 some as specific parts of larger such clusters and two of the several vomeronasal receptor clusters  
319 in the genome show an introgression signal. This would suggest that they code for sub-types that  
320 may be particularly relevant for an evolutionary active process.

321 There are four regions that code for SPEER/Takusan domain genes. These were originally  
322 identified as testis-specific genes (Spiess et al., 2003) and they occur in several clusters in the  
323 genome. The genes have specifically evolved in the rodent lineage, possibly through some protein  
324 domain fusions and fast subsequent evolution. The variants occurring on chromosome 14 were also  
325 implicated in the regulation of synaptic activity (Tu et al., 2007) but these are also more expressed  
326 in testis than in brain (see also expression data provided in Harr et al. (2016)). In their study on  
327 postmeiotic transcription in sperm cells, Moretti et al. (2016) speculate that these genes may act  
328 in a meiotic drive dynamics, possibly as suppressors of the intragenomic conflict between *Slx* and  
329 *Sly* gene families (Helleu et al., 2015). Interestingly, the *Slx* gene cluster on the X chromosome  
330 shows also corresponding introgression patterns (suppl. Table 5) and, the *Sly* gene cluster on  
331 the Y-chromosome shows similar patterns (although we have not included these in our analysis  
332 because of too many missing data, we provide the partial data in the track patterns of "wildmouse-  
333 introgression").

334 Another region that was suggested to be involved in transmission ratio distortion is *Cwc22* or  
335 *R2D2* on chromosome 2 (Didion et al., 2016). Population genetic studies of this region have shown  
336 that it shows major copy number variation changes between populations (Pezer et al., 2015; Didion  
337 et al., 2016) and that it was involved in recent selective sweeps (Didion et al., 2016). Hence, this is  
338 also a region with clear introgression patterns that has a proven high evolutionary dynamics.

## 339 Conclusions

340 Although the populations we have included in our analysis are all very distinct, either due to  
341 allopatry or long evolutionary separation, they exchange nonetheless genes. Most of the genes that  
342 are exchanged have evident adaptive significance, including the case of the *Amy2b* gene, where a  
343 pseudogene allele became replaced by an active allele from another subspecies. Given that our  
344 study has focused on high frequency variants and that most of them are associated to various  
345 forms of immune defense, we can assume that most of the introgression events that we are tracing  
346 here have been adaptive. Hence, by identifying these introgression regions, we find at the same  
347 time candidate genes for frequent adaptations in mice.

## 348 Methods and Materials

### 349 Ethic statement

350 Mice were caught as described in *Harr et al. (2016)*. Transportation of live mice to the animal  
351 facility, maintenance and handling were conducted in accordance with German animal welfare law  
352 (Tierschutzgesetz) and FELASA guidelines. Permits for keeping mice were obtained from the local  
353 veterinary office 'Veterinäramt Kreis Plön' (permit number: 1401-144/PLÖ-004697).

### 354 Data and mouse samples

355 Genome data used in this study (*M. m. domesticus* GER - 8 individuals, *M. m. domesticus* FRA - 8  
356 individuals, *M. m. domesticus* IRA - 8 individuals, *M. m. musculus* AFG - 6 individuals, *M. m. castaneus*  
357 CAS - 10 individuals, and *M. spretus* SPRE - 8 individuals) were taken from *Harr et al. (2016)*. Mouse  
358 samples were taken from the collection at our institute - sources are described in *Harr et al. (2016)*  
359 and *Linnenbrink et al. (2013)*.

### 360 dK80 calculation

361 Quartets were used for all calculations of dK80. They included always the three DOM populations  
362 (Ger [X], Fra [Y] and Ira [Z]), as well as one of the three outgroups each, MUS [ $O_1$ ], CAS[ $O_2$ ] or SPRE  
363 [ $O_3$ ] (compare Figure 1). Within the quartets, dK80 was calculated for trios (either with Ger or Fra)  
364 on non-overlapping sequence windows ( $w$ ) throughout the genome between this population triplet  
365 on a window ( $w_i$ ) as:

$$dK80_{XZOw_i} = d_{XOw_i} - d_{XZw_i} \quad (1)$$

366 where  $d_{XOw_i}$  and  $d_{XZw_i}$  are defined as the average Kimura's 2-parameter sequence distance (*Kimura,*  
367 *1980*) between the corresponding two populations calculated with the function 'dist.dna' of the R  
368 package 'ape' (*Paradis et al., 2004*) using the model 'K80'. Prior the calculation of dK80 all sites with  
369 missing data (see below) within the specified window ( $w_i$ ) and the specified populations ([X], [Z],  
370 [O]) were removed across the whole quartet with the 'Biostrings' R package (*Pages et al., 2009*) and  
371 only those windows retained with a missing rate lower than 50%.

### 372 Population specific masking

373 Sequences with low coverage (missing data) were excluded from the analysis by masking them  
374 for each quartet under analysis. Masking files were generated by processing the BAM files with  
375 'genomeCoverageBed' and 'mergeBed' from the bedtools2 software suite (*Quinlan and Hall, 2010,*  
376 v2.26.0) to obtain site specific genome coverage per individual. Sites with a coverage smaller than 5  
377 were used as masking regions for each individual. Further, to obtain population specific masking  
378 regions, site specific genome coverage files were united with 'unionBedGraphs' and sites with a  
379 united coverage smaller than 5 were used as masking regions for the populations. Suppl. Tables  
380 1-3 provide for each window the numbers of masked ("missing") sites. Windows that had more than  
381 50% sites missing were not included in the overall analysis.

## 382 Consensus sequences

383 To construct individual and population specific consensus sequences, we conducted first a SNP  
384 calling on the mapped BAM files taken from *Harr et al. (2016)*. Briefly, BAM files for individuals  
385 grouped by population were processed with 'samtools mpileup' and 'bcftools call' (*Li, 2011*, v1.3.1)  
386 with relaxed mapping quality options (samtools mpileup: -q 0 -Q 10 -A -d 99999 -t DP,AD,ADF,ADR  
387 -uf mm10.fasta; bcftools call: -f GQ -m -v) to also retain information in CNV regions. We corrected  
388 also for individual sex and ploidy (chrY F 0; chrX M 1; chrY M 1; chrM F 1; chrM M 1). We note that  
389 many of the here described introgression regions occur in copy number variable regions, which  
390 are often filtered out in standard analyses that constrain the data to high quality mapped reads. In  
391 our simulations we paid particular attention to such regions to assess whether the inclusion of low  
392 quality mapped reads would lead to artifacts with respect to introgression signals, but we did not  
393 find this to be the case. If anything, the inclusion of these reads would only make distance larger  
394 rather than smaller.

395 The resulting population specific VCF files were recoded with 'vcftools' (*Danecek et al., 2011*,  
396 v0.1.15) to remove indels and to only retain variant sites (vcftools: -recode -remove-indels -recode-  
397 INFO-all -non-ref-ac-any 1) either for the complete population (-keep pop) or for the individuals  
398 (-keep ind). Further, the recoded population specific VCF file containing multiple individuals was  
399 parsed with 'vcfparser.py mvcf2consensus' (<https://gitlab.gwdg.de/evolgen/introgression>; -cdp 11)  
400 to obtain a CONSENSUS VCF file for each population. In brief, the allelic depth information for the  
401 reference and alternative allele was summed over all individuals per population by simultaneously  
402 removing all sites which had a total depth (reference plus alternative allelic depth) of smaller than  
403 11 in the population (DP<11).

404 The CONSENSUS VCF was used in combination with the population specific masking region to  
405 construct chromosome alignments with the reference (GRCm38/mm10) and the python script  
406 'vcfparser.py vcf2fasta' (<https://gitlab.gwdg.de/evolgen/introgression>; -type refmajorsample -R  
407 mm10.fasta -cov2N 4) to obtain the major allele per variant and to mask all regions with a coverage  
408 smaller than 5. This step was repeated for individuals using the individual masking regions resulting  
409 in CONSENSUS and INDIVIDUAL FASTA files used for the inference of introgression.

## 410 Simulations

411 Simulations were performed to evaluate dK80 under a phylogenetic scenario mimicking the real  
412 data without introgression, as well as to ensure that the mapping procedure does not lead to  
413 artefacts, especially in the copy number variable regions (see Figure 1-Figure supplement 6 for the  
414 simulation design).

415 First, to provide the appropriate distance framework, all pair-wise polymorphic sites and all pair-  
416 wise informative sites (excluding pair-wise missing sites) of all autosomes were counted between  
417 the investigated populations using the CONSENSUS FASTA files. The resulting pair-wise distances  
418 defined as:

$$d_{xy} = \frac{\sum_{n=chr1}^{chr19} \text{polymorphic sites}_{xy}}{\sum_{n=chr1}^{chr19} \text{informative sites}_{xy}} \quad (2)$$

419 where  $d_{xy}$  is the pair-wise distance between the consensus sequence of population  $x$  and  $y$ , were  
420 then used as a distance matrix to calculate an "Unweighted Pair Group Method with Arithmetic  
421 Mean" (UPGMA) tree in R. The resulting UPGMA tree distances were used as a proxy to simulate  
422 chromosome 1 with the python script 'simdiv.py' taking the phylogenetic context into account.

423 Second, the simulated sequences representative of each population (SPRE, CAS, MUS, Ira, Ger,  
424 Fra) were used to generate artificial Illumina reads to test the influence of possible sequencing errors  
425 with 'ART' (*Huang et al., 2011*, v2.5.8) and to mimic the original sequence libraries (art\_illumina: -sam  
426 -na -ss HS20 -f 20 -l 100 -m 250 -s 80 -p). Subsequently, the artificial Illumina reads were mapped  
427 against the simulated reference with 'bwa mem' (*Li and Durbin, 2009*, 0.7.12-r1039), followed by  
428 sorting, marking and removing duplicates with the picard software suite (<https://broadinstitute>).

429 [github.io/picard/](https://github.io/picard/)) and an indel realignment step with 'GATK' (*McKenna et al., 2010*, v3.7) as described  
430 in *Harr et al. (2016)*. Masking, SNP calling, FASTA sequence construction and dK80 calculation was  
431 performed as described above.

### 432 **Data visualization and availability**

433 Data visualization was done with the UCSC genome browser for the mouse assembly mm10.  
434 Custom tracks were generated and are available as "Public Session" under the term "wildmouse-  
435 introgression". Individual and population specific consensus sequences can be accessed via ftp  
436 <http://wwwuser.gwdg.de/evolbio/evolgen/wildmouse/introgression/>.

### 437 **Amylase purification and quantification**

438 Approximately equal weights of pancreas per sample were used for purification. Tissues were  
439 homogenised in PBS using a TissueLyser II (Qiagen), centrifuged at 13,000 x g at 4°C for 10 minutes,  
440 and the crude lysate was collected. Ethanol was added to a final concentration of 40%, centrifuged  
441 at 10,000 x g for 10 minutes at 4°C, and the supernatant was collected. Amylase was precipitated  
442 by addition of 1mg of oyster glycogen (Sigma-Aldrich) according to *Schramm and Loyter (1966)*,  
443 followed by shaking on ice for 5 minutes. It was then pelleted by centrifugation at 5,000 x g for  
444 3 minutes at 4°C. The samples were washed, re-suspended in PBS, and glycogen digested by  
445 incubation at 30°C for 20 minutes (*Hjorth, 1979*). Samples were stored at -80°C in aliquots to avoid  
446 repeated freeze/thaw cycles.

447 Protein concentration was determined using Thermo Scientific's Coomassie Plus™ (Bradford)  
448 Assay kit according to the manufacturer's instructions as follows. A standard curve was generated  
449 using the BSA provided at 2000, 1500, 1000, 750, 500, 250, 125 and 25 µg/mL. All unknown samples  
450 were diluted 1:2, and 10 µL of each sample and standard was added to a 96 well plate in duplicate.  
451 A PBS blank was also included. 300 µL of Coomassie Plus Reagent was added to each well and  
452 mixed on a plate mixer for 30 seconds. The plate was incubated at room temperature for 10  
453 minutes, and then measured on a Tecan Infinite® M200 PRO plate reader at 595nm. The blank  
454 measurement was subtracted from all other readings, and then the concentration of the unknown  
455 samples determined using the standard curve, and multiplied by the dilution factor.

### 456 **Native PAGE**

457 Amylase extracts were separated on 7.5% Mini-PROTEAN® TGX™ gels (Bio-Rad), but in their native  
458 form (no boiling, no SDS). Gels were loaded with 1.5 µg of each sample (using Bradford assay  
459 measurements) and run for 45 minutes at 100V, followed by 3 hours 45 minutes at 300V, with the  
460 tank immersed in ice throughout (adapted from *Hjorth, 1979*). Western blot analysis was done by  
461 semi-dry transfer to PVDF membrane for one hour at 20V, followed by blocking the membrane with  
462 5% milk powder in PBS supplemented with 0.1% tween for one hour at room temperature. The  
463 membrane was probed for amylase using anti- $\alpha$ -amylase antibody from Cell Signalling (#4017)  
464 at 1:2000 in 2% milk in PBS tween overnight at 4°C. The primary antibody was detected using  
465 goat anti-rabbit HRP (Southern Biotech) at 1:5000 for one hour at room temperature followed  
466 by incubation with Immun-Star™ WesternC™ Chemiluminescent substrate (Bio-Rad). Blots were  
467 visualised using an Alpha Innotech FluorChem™ Multimage™ light cabinet.

### 468 **Amylase activity**

469 The activity of each sample was determined using an amylase activity assay kit (Sigma-Aldrich),  
470 which measures a colorimetric product resulting from the cleavage of ethylidene-pNP-G7 by amy-  
471 lase to generate p-nitrophenol. Samples were measured with a slightly modified version of the  
472 manufacturer's instructions as follows. A nitrophenol standard curve was generated by adding 0,  
473 2, 4, 6, 8, and 10 µL of 2mM Nitrophenol Standard to a 96 well plate and adding water to a final  
474 volume of 50 µL. Unknown samples were diluted 1:5000 and 50 µL added to the plate in duplicate.  
475 Amylase Assay Buffer and Amylase Substrate Mix were mixed together 1:1 and 100 µL added to each

well. After 3 minutes incubation ( $= T_{initial}$ ) a reading was taken at 405nm ( $A405_{initial}$ ). The plate was incubated at 25°C and the absorbance measured every 2 minutes (as opposed to every 5 minutes in the manufacturer's instructions). Readings were taken until the value of the most active sample exceeded the linear range of the standard curve.  $A405_{final}$  was taken as the penultimate reading before this. The background was subtracted, and the change in absorbance from  $T_{initial}$  to  $T_{final}$  calculated:  $\Delta A405 = A405_{final} - A405_{initial}$ . The amount of nitrophenol generated between  $T_{initial}$  to  $T_{final}$  was calculated using the standard curve. The activity was then determined using the equation:

$$\text{Amylase Activity} = \frac{B \times \text{Sample Dilution Factor}}{(\text{Reaction Time}) \times V} \quad (3)$$

where:  $B$  = Amount (nmole) of nitrophenol generated between  $T_{initial}$  and  $T_{final}$  Reaction Time =  $T_{final} - T_{initial}$  (minutes)  $V$  = sample volume (mL) added to well One unit of amylase is the amount of amylase that cleaves ethylidene-pNP-G7 to generate 1.0 m mole of p-nitrophenol per minute at 25°C.

## Acknowledgments

We thank Emre Karakoc for the initial exploration of algorithms to detect introgression patterns in the mouse dataset, Ellen McConnell for the alpha-amylase experiments and the members of our lab for comments on the manuscript.

## Additional information

### Competing interests

DT: Senior editor, *eLife*. The other authors declare that no competing interests exist.

## References

- Abi-Rached L**, Jobin MJ, Kulkarni S, McWhinnie A, Dalva K, Gragert L, Babrzadeh F, Gharizadeh B, Luo M, Plummer FA, et al. The shaping of modern human immune systems by multiregional admixture with archaic humans. *Science*. 2011; 334(6052):89–94.
- Chavarría-Smith J**, Vance RE. The NLRP1 inflammasomes. *Immunological reviews*. 2015; 265(1):22–34.
- Cucchi T**, Vigne JD, Auffray JC. First occurrence of the house mouse (*Mus musculus domesticus* Schwarz & Schwarz, 1943) in the Western Mediterranean: a zooarchaeological revision of subfossil occurrences. *Biological Journal of the Linnean Society*. 2005; 84(3):429–445.
- Danecek P**, Auton A, Abecasis G, Albers CA, Banks E, DePristo MA, Handsaker RE, Lunter G, Marth GT, Sherry ST, et al. The variant call format and VCFtools. *Bioinformatics*. 2011; 27(15):2156–2158.
- Didion JP**, Morgan AP, Yadgary L, Bell TA, McMullan RC, Ortiz de Solorzano L, Britton-Davidian J, Bult CJ, Campbell KJ, Castiglia R, et al. R2d2 drives selfish sweeps in the house mouse. *Molecular biology and evolution*. 2016; 33(6):1381–1395.
- Durand EY**, Patterson N, Reich D, Slatkin M. Testing for ancient admixture between closely related populations. *Molecular biology and evolution*. 2011; 28(8):2239–2252.
- Fraser SD**, Sadofsky LR, Kaye PM, Hart SP. Reduced expression of monocyte CD200R is associated with enhanced proinflammatory cytokine production in sarcoidosis. *Scientific reports*. 2016; 6:38689.
- Green RE**, Krause J, Briggs AW, Maricic T, Stenzel U, Kircher M, Patterson N, Li H, Zhai W, Fritz MHY, et al. A draft sequence of the Neandertal genome. *science*. 2010; 328(5979):710–722.
- Grossen C**, Keller L, Biebach I, Croll D, Consortium IGG, et al. Introgression from domestic goat generated variation at the major histocompatibility complex of alpine ibex. *PLoS genetics*. 2014; 10(6):e1004438.
- Guénet JL**, Bonhomme F. Wild mice: an ever-increasing contribution to a popular mammalian model. *Trends in Genetics*. 2003; 19(1):24–31.

- 518 **Hamid HS**, Darvish J, Rastegar-Pouyani E, Mahmoudi A. Subspecies differentiation of the house mouse *Mus*  
519 *musculus* Linnaeus, 1758 in the center and east of the Iranian plateau and Afghanistan. *Mammalia*. 2017;  
520 81(2):147–168.
- 521 **Hardouin EA**, Orth A, Teschke M, Darvish J, Tautz D, Bonhomme F. Eurasian house mouse (*Mus musculus*  
522 L.) differentiation at microsatellite loci identifies the Iranian plateau as a phylogeographic hotspot. *BMC*  
523 *evolutionary biology*. 2015; 15(1):26.
- 524 **Harr B**, Karakoc E, Neme R, Teschke M, Pfeifle C, Pezer Ž, Babiker H, Linnenbrink M, Montero I, Scavetta R,  
525 et al. Genomic resources for wild populations of the house mouse, *Mus musculus* and its close relative *Mus*  
526 *spretus*. *Scientific data*. 2016; 3:160075.
- 527 **Hasenkamp N**, Solomon T, Tautz D. Selective sweeps versus introgression-population genetic dynamics of  
528 the murine leukemia virus receptor *Xpr1* in wild populations of the house mouse (*Mus musculus*). *BMC*  
529 *evolutionary biology*. 2015; 15(1):248.
- 530 **Hedrick PW**. Adaptive introgression in animals: examples and comparison to new mutation and standing  
531 variation as sources of adaptive variation. *Molecular ecology*. 2013; 22(18):4606–4618.
- 532 **Helleu Q**, Gérard PR, Montchamp-Moreau C. Sex chromosome drive. *Cold Spring Harbor perspectives in biology*.  
533 2015; 7(2):a017616.
- 534 **Hjorth JP**. Genetic variation in mouse salivary amylase rate of synthesis. *Biochemical genetics*. 1979; 17(7):665–  
535 682.
- 536 **Hocking AM**. The role of chemokines in mesenchymal stem cell homing to wounds. *Advances in wound care*.  
537 2015; 4(11):623–630.
- 538 **Huang W**, Li L, Myers JR, Marth GT. ART: a next-generation sequencing read simulator. *Bioinformatics*. 2011;  
539 28(4):593–594.
- 540 **Ihle S**, Ravaoarimanana I, Thomas M, Tautz D. An analysis of signatures of selective sweeps in natural populations  
541 of the house mouse. *Molecular Biology and Evolution*. 2006; 23(4):790–797.
- 542 **Imbeault M**, Helleboid PY, Trono D. KRAB zinc-finger proteins contribute to the evolution of gene regulatory  
543 networks. *Nature*. 2017; 543(7646):550–554.
- 544 **Jacobs FM**, Greenberg D, Nguyen N, Haeussler M, Ewing AD, Katzman S, Paten B, Salama SR, Haussler D. An  
545 evolutionary arms race between KRAB zinc finger genes 91/93 and *SVA/L1* retrotransposons. *Nature*. 2014;  
546 516(7530):242.
- 547 **Janoušek V**, Munclinger P, Wang L, Teeter KC, Tucker PK. Functional organization of the genome may shape the  
548 species boundary in the house mouse. *Molecular biology and evolution*. 2015; 32(5):1208–1220.
- 549 **Janoušek V**, Wang L, Luzynski K, Dufková P, Vyskočilová MM, Nachman MW, Munclinger P, Macholán M, Piálek J,  
550 Tucker PK. Genome-wide architecture of reproductive isolation in a naturally occurring hybrid zone between  
551 *Mus musculus musculus* and *M. m. domesticus*. *Molecular Ecology*. 2012; 21(12):3032–3047.
- 552 **Kauzlaric A**, Ecco G, Cassano M, Duc J, Imbeault M, Trono D. The mouse genome displays highly dynamic  
553 populations of KRAB-zinc finger protein genes and related genetic units. *PLoS one*. 2017; 12(3):e0173746.
- 554 **Keyes BE**, Liu S, Asare A, Naik S, Levorse J, Polak L, Lu CP, Nikolova M, Pasolli HA, Fuchs E. Impaired epidermal to  
555 dendritic T cell signaling slows wound repair in aged skin. *Cell*. 2016; 167(5):1323–1338.
- 556 **Kimura M**. A simple method for estimating evolutionary rates of base substitutions through comparative  
557 studies of nucleotide sequences. *Journal of molecular evolution*. 1980; 16(2):111–120.
- 558 **Kumar V**, Lammers F, Bidon T, Pfenninger M, Kolter L, Nilsson MA, Janke A. The evolutionary history of bears is  
559 characterized by gene flow across species. *Scientific Reports*. 2017; 7.
- 560 **Laurie CC**, Nickerson DA, Anderson AD, Weir BS, Livingston RJ, Dean MD, Smith KL, Schadt EE, Nachman MW.  
561 Linkage disequilibrium in wild mice. *PLoS Genetics*. 2007; 3(8):e144.
- 562 **Li H**. A statistical framework for SNP calling, mutation discovery, association mapping and population genetical  
563 parameter estimation from sequencing data. *Bioinformatics*. 2011; 27(21):2987–2993.
- 564 **Li H**, Durbin R. Fast and accurate short read alignment with Burrows–Wheeler transform. *Bioinformatics*. 2009;  
565 25(14):1754–1760.



- 566 **Linnenbrink M**, Wang J, Hardouin EA, Künzel S, Metzler D, Baines JF. The role of biogeography in shaping  
567 diversity of the intestinal microbiota in house mice. *Molecular ecology*. 2013; 22(7):1904–1916.
- 568 **Liu KJ**, Dai J, Truong K, Song Y, Kohn MH, Nakhleh L. An HMM-based comparative genomic framework for  
569 detecting introgression in eukaryotes. *PLoS computational biology*. 2014; 10(6):e1003649.
- 570 **Liu KJ**, Steinberg E, Yozzo A, Song Y, Kohn MH, Nakhleh L. Interspecific introgressive origin of genomic diversity  
571 in the house mouse. *Proceedings of the National Academy of Sciences*. 2015; 112(1):196–201.
- 572 **Martin SH**, Davey JW, Jiggins CD. Evaluating the use of ABBA–BABA statistics to locate introgressed loci. *Molecular*  
573 *biology and evolution*. 2014; 32(1):244–257.
- 574 **McKenna A**, Hanna M, Banks E, Sivachenko A, Cibulskis K, Kernytsky A, Garimella K, Altshuler D, Gabriel S,  
575 Daly M, et al. The Genome Analysis Toolkit: a MapReduce framework for analyzing next-generation DNA  
576 sequencing data. *Genome research*. 2010; 20(9):1297–1303.
- 577 **Morales J**, Homey B, Vicari AP, Hudak S, Oldham E, Hedrick J, Orozco R, Copeland NG, Jenkins NA, McEvoy  
578 LM, et al. CTACK, a skin-associated chemokine that preferentially attracts skin-homing memory T cells.  
579 *Proceedings of the National Academy of Sciences*. 1999; 96(25):14470–14475.
- 580 **Moretti C**, Vaiman D, Tores F, Cocquet J. Expression and epigenomic landscape of the sex chromosomes in  
581 mouse post-meiotic male germ cells. *Epigenetics & chromatin*. 2016; 9(1):47.
- 582 **O'Reilly MA**, Yee M, Buczynski BW, Vitiello PF, Keng PC, Welle SL, Finkelstein JN, Dean DA, Lawrence BP. Neonatal  
583 oxygen increases sensitivity to influenza A virus infection in adult mice by suppressing epithelial expression  
584 of Ear1. *The American journal of pathology*. 2012; 181(2):441–451.
- 585 **Pages H**, Aboyoun P, Gentleman R, DebRoy S. String objects representing biological sequences, and matching  
586 algorithms. R package version. 2009; 2(2).
- 587 **Paradis E**, Claude J, Strimmer K. APE: analyses of phylogenetics and evolution in R language. *Bioinformatics*.  
588 2004; 20(2):289–290.
- 589 **Parham P**, Ohta T, et al. Population biology of antigen presentation by MHC class I molecules. *SCIENCE-NEW*  
590 *YORK THEN WASHINGTON*. 1996; p. 67–73.
- 591 **Pease JB**, Hahn MW. Detection and polarization of introgression in a five-taxon phylogeny. *Systematic biology*.  
592 2015; 64(4):651–662.
- 593 **Pezer Ž**, Harr B, Teschke M, Babiker H, Tautz D. Divergence patterns of genic copy number variation in natural  
594 populations of the house mouse (*Mus musculus domesticus*) reveal three conserved genes with major  
595 population-specific expansions. *Genome research*. 2015; 25(8):1114–1124.
- 596 **Phifer-Rixey M**, Nachman MW. The Natural History of Model Organisms: Insights into mammalian biology from  
597 the wild house mouse *Mus musculus*. *Elife*. 2015; 4:e05959.
- 598 **Quach H**, Rotival M, Pothlichet J, Loh YHE, Dannemann M, Zidane N, Laval G, Patin E, Harmant C, Lopez M, et al.  
599 Genetic adaptation and neandertal admixture shaped the immune system of human populations. *Cell*. 2016;  
600 167(3):643–656.
- 601 **Quinlan AR**, Hall IM. BEDTools: a flexible suite of utilities for comparing genomic features. *Bioinformatics*. 2010;  
602 26(6):841–842.
- 603 **Sage RD**, Heyneman D, Lim KC, Wilson AC. Wormy mice in a hybrid zone. *Nature*. 1986; 324(6092):60–63.
- 604 **Saitou N**, Nei M. The neighbor-joining method: a new method for reconstructing phylogenetic trees. *Molecular*  
605 *biology and evolution*. 1987; 4(4):406–425.
- 606 **Salazar C**, Baxter SW, Pardo-Diaz C, Wu G, Surrridge A, Linares M, Bermingham E, Jiggins CD. Genetic evidence  
607 for hybrid trait speciation in *Heliconius* butterflies. *PLoS genetics*. 2010; 6(4):e1000930.
- 608 **Schramm M**, Loyter A. Purification of  $\alpha$ -amylase by precipitation of amylase-glycogen complexes. *Methods*  
609 *Enzymology*. 1966; 8:533–537.
- 610 **Snelgrove RJ**, Goulding J, Didierlaurent AM, Lyonga D, Vekaria S, Edwards L, Gwyer E, Sedgwick JD, Barclay AN,  
611 Hussell T. A critical function for CD200 in lung immune homeostasis and the severity of influenza infection.  
612 *Nature immunology*. 2008; 9(9):1074–1083.

- 613 **Song Y**, Endepols S, Klemann N, Richter D, Matuschka FR, Shih CH, Nachman MW, Kohn MH. Adaptive introgression of anticoagulant rodent poison resistance by hybridization between old world mice. *Current Biology*. 2011; 21(15):1296–1301.
- 614  
615
- 616 **Spieß AN**, Walther N, Mueller N, Balvers M, Hansis C, Ivell R. SPEER-a new family of testis-specific genes from the mouse. *Biology of reproduction*. 2003; 68(6):2044–2054.
- 617
- 618 **Staubach F**, Lorenc A, Messer PW, Tang K, Petrov DA, Tautz D. Genome patterns of selection and introgression of haplotypes in natural populations of the house mouse (*Mus musculus*). *PLoS Genetics*. 2012; 8(8):e1002891.
- 619
- 620 **Stavrou S**, Blouch K, Kotla S, Bass A, Ross SR. Nucleic acid recognition orchestrates the anti-viral response to retroviruses. *Cell host & microbe*. 2015; 17(4):478–488.
- 621
- 622 **Storz JF**, Baze M, Waite JL, Hoffmann FG, Opazo JC, Hayes JP. Complex signatures of selection and gene conversion in the duplicated globin genes of house mice. *Genetics*. 2007; 177(1):481–500.
- 623
- 624 **Stukenbrock EH**. The role of hybridization in the evolution and emergence of new fungal plant pathogens. *Phytopathology*. 2016; 106(2):104–112.
- 625
- 626 **Taylor K**, Rolfe M, Reynolds N, Kilanowski F, Pathania U, Clarke D, Yang D, Oppenheim J, Samuel K, Howie S, et al. Defensin-related peptide 1 (Defr1) is allelic to Defb8 and chemoattracts immature DC and CD4+ T cells independently of CCR6. *European journal of immunology*. 2009; 39(5):1353–1360.
- 627  
628
- 629 **Teeter KC**, Payseur BA, Harris LW, Bakewell MA, Thibodeau LM, O'Brien JE, Krenz JG, Sans-Fuentes MA, Nachman MW, Tucker PK. Genome-wide patterns of gene flow across a house mouse hybrid zone. *Genome research*. 2008; 18(1):67–76.
- 630  
631
- 632 **Teschke M**, Mukabayire O, Wiehe T, Tautz D. Identification of selective sweeps in closely related populations of the house mouse based on microsatellite scans. *Genetics*. 2008; 180(3):1537–1545.
- 633
- 634 **Tu S**, Shin Y, Zago WM, States BA, Eroshkin A, Lipton SA, Tong GG, Nakanishi N. Takusan: a large gene family that regulates synaptic activity. *Neuron*. 2007; 55(1):69–85.
- 635
- 636 **Turner LM**, Harr B. Genome-wide mapping in a house mouse hybrid zone reveals hybrid sterility loci and Dobzhansky-Muller interactions. *Elife*. 2014; 3:e02504.
- 637
- 638 **Usami Y**, Wu Y, Göttlinger HG. SERINC3 and SERINC5 restrict HIV-1 infectivity and are counteracted by Nef. *Nature*. 2015; 526(7572):218.
- 639
- 640 **Wang L**, Luzynski K, Pool JE, Janoušek V, Dufkova P, Vyskočilová MM, Teeter KC, Nachman MW, Munclinger P, Macholán M, et al. Measures of linkage disequilibrium among neighbouring SNPs indicate asymmetries across the house mouse hybrid zone. *Molecular ecology*. 2011; 20(14):2985–3000.
- 641  
642
- 643 **Wu Y**, Guo Z, Yao K, Miao Y, Liang S, Liu F, Wang Y, Zhang Y. The transcriptional foundations of Sp110-mediated macrophage (RAW264. 7) resistance to *Mycobacterium tuberculosis* H37Ra. *Scientific reports*. 2016; 6.
- 644
- 645 **Yu Y**, Degnan JH, Nakhleh L. The probability of a gene tree topology within a phylogenetic network with applications to hybridization detection. *PLoS genetics*. 2012; 8(4):e1002660.
- 646
- 647 **Zhang W**, Dasmahapatra KK, Mallet J, Moreira GR, Kronforst MR. Genome-wide introgression among distantly related *Heliconius* butterfly species. *Genome biology*. 2016; 17(1):25.
- 648

649 **Tables and Figures (not placed within the main text)**

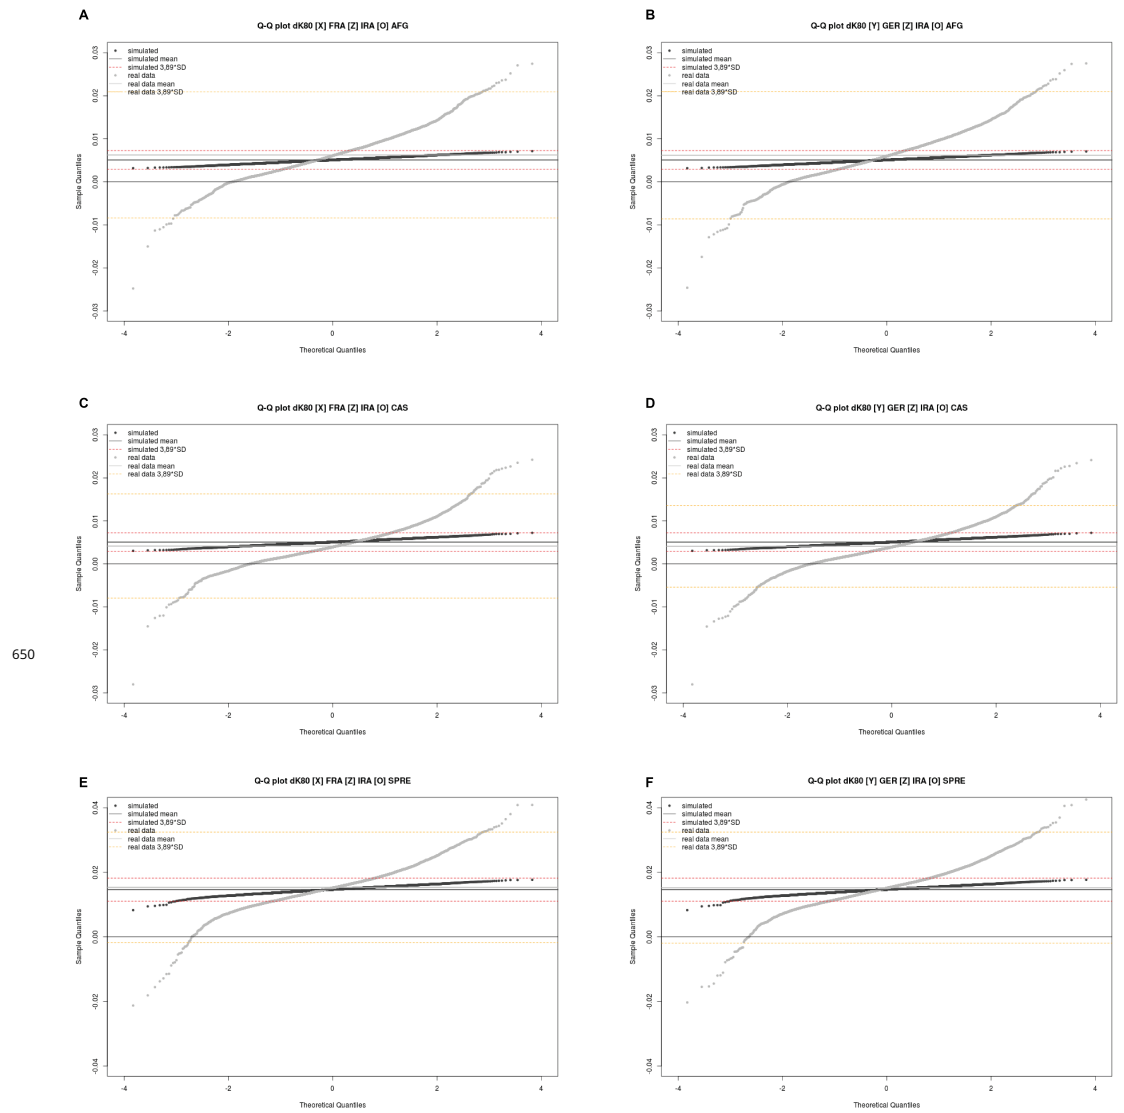

**Figure 1-Figure supplement 1. dk80 q-q plots for different population combinations.** (A) [X]: Fra [Z]: IRA [O<sub>1</sub>]: AFG, (B) [Y]: Ger [Z]: IRA [O<sub>1</sub>]: AFG, (C) [X]: Fra [Z]: IRA [O<sub>2</sub>]: CAS, (D) [Y]: Ger [Z]: IRA [O<sub>2</sub>]: CAS, (E) [X]: Fra [Z]: IRA [O<sub>3</sub>]: SPRE, (F) [Y]: Ger [Z]: IRA [O<sub>3</sub>]: SPRE. Mean of dk80 distribution is highlighted as solid lines (black: simulated data; grey: real data), 3.89 standard deviations are highlighted by dashed lines (red: simulated data; orange: real data).

|          | A                                                                               | B       | C       | D       | E          | F          | G          |
|----------|---------------------------------------------------------------------------------|---------|---------|---------|------------|------------|------------|
| <b>1</b> | <b>dk80 values and total tree length for x (FRA), y(GER), z(IRA) and O(MUS)</b> |         |         |         |            |            |            |
| <b>2</b> | CHR                                                                             | START   | END     | MISSING | dk80_FRA   | dk80_GER   | TREELNGTH  |
| 151      | chr1                                                                            | 3700001 | 3725000 | 153     | 0.0103784  | 0.011168   | 0.01371579 |
| 152      | chr1                                                                            | 3725001 | 3750000 | 362     | 0.00533476 | 0.00853908 | 0.01234405 |
| 153      | chr1                                                                            | 3750001 | 3775000 | 567     | 0.01707585 | 0.01784546 | 0.01993973 |
| 154      | chr1                                                                            | 3775001 | 3800000 | 1385    | 0.00721186 | 0.00741082 | 0.01598245 |
| 155      | chr1                                                                            | 3800001 | 3825000 | 1380    | 0.00333998 | 0.00350462 | 0.01025122 |
| 156      | chr1                                                                            | 3825001 | 3850000 | 40      | 0.00360553 | 0.00343774 | 0.01058511 |
| 157      | chr1                                                                            | 3850001 | 3875000 | 61      | 0.00520741 | 0.00512491 | 0.00773203 |
| 158      | chr1                                                                            | 3875001 | 3900000 | 2145    | 0.00705015 | 0.00695451 | 0.00885893 |
| 159      | chr1                                                                            | 3900001 | 3925000 | 1266    | 0.0062787  | 0.00669867 | 0.00887096 |
| 160      | chr1                                                                            | 3925001 | 3950000 | 179     | 0.01292228 | 0.01267463 | 0.01586174 |
| 161      | chr1                                                                            | 3950001 | 3975000 | 68      | 0.01706809 | 0.01648653 | 0.01775725 |
| 162      | chr1                                                                            | 3975001 | 4000000 | 829     | 0.0157333  | 0.01567397 | 0.01794409 |
| 163      | chr1                                                                            | 4000001 | 4025000 | 52      | 0.00560981 | 0.00617481 | 0.00916173 |
| 164      | chr1                                                                            | 4025001 | 4050000 | 45      | 0.00190678 | -0.0006099 | 0.01736611 |
| 165      | chr1                                                                            | 4050001 | 4075000 | 10      | 0.00281646 | 0.00168999 | 0.00687375 |
| 166      | chr1                                                                            | 4075001 | 4100000 | 359     | 0.00313861 | 0.00346266 | 0.0055956  |
| 167      | chr1                                                                            | 4100001 | 4125000 | 40      | 0.00080782 | 0.00096833 | 0.00876572 |

**Figure 1–Figure supplement 2. Preview of supplementary Table 1.** dk80 values for all genomic 25kb windows for the quartet [X]: Fra [Y]: Ger [Z]: Ira [O<sub>1</sub>]: AFG.

|          | A                                                                               | B       | C       | D       | E          | F          | G          |
|----------|---------------------------------------------------------------------------------|---------|---------|---------|------------|------------|------------|
| <b>1</b> | <b>dk80 values and total tree length for x (FRA), y(GER), z(IRA) and O(CAS)</b> |         |         |         |            |            |            |
| <b>2</b> | CHR                                                                             | START   | END     | MISSING | dk80_FRA   | dk80_GER   | TREELNGTH  |
| 151      | chr1                                                                            | 3700001 | 3725000 | 47      | 0.00756217 | 0.00835253 | 0.0108871  |
| 152      | chr1                                                                            | 3725001 | 3750000 | 310     | 0.00536545 | 0.00774192 | 0.01190855 |
| 153      | chr1                                                                            | 3750001 | 3775000 | 296     | 0.01892805 | 0.01985318 | 0.02186232 |
| 154      | chr1                                                                            | 3775001 | 3800000 | 4       | -0.0010885 | 0.00217617 | 0.00981836 |
| 155      | chr1                                                                            | 3800001 | 3825000 | 1378    | -0.0024733 | -0.0019156 | 0.00771982 |
| 156      | chr1                                                                            | 3825001 | 3850000 | 64      | 0.00239069 | 0.00263015 | 0.01150338 |
| 157      | chr1                                                                            | 3850001 | 3875000 | 7       | 0.00539885 | 0.00523547 | 0.00771566 |
| 158      | chr1                                                                            | 3875001 | 3900000 | 44      | 0.00329995 | 0.00329684 | 0.00518171 |
| 159      | chr1                                                                            | 3900001 | 3925000 | 6       | 0.00689359 | 0.00720878 | 0.00949032 |
| 160      | chr1                                                                            | 3925001 | 3950000 | 1       | 0.00373886 | 0.00373845 | 0.00688184 |
| 161      | chr1                                                                            | 3950001 | 3975000 | 1       | 0.01313399 | 0.01255869 | 0.01380397 |
| 162      | chr1                                                                            | 3975001 | 4000000 | 9       | 0.00705747 | 0.00737391 | 0.00957724 |
| 163      | chr1                                                                            | 4000001 | 4025000 | 2       | 0.00733942 | 0.00668748 | 0.0102754  |
| 164      | chr1                                                                            | 4025001 | 4050000 | 2       | -0.0010518 | -0.0035599 | 0.0143271  |
| 165      | chr1                                                                            | 4050001 | 4075000 | 0       | 0.00108464 | -0.00012   | 0.00515088 |
| 166      | chr1                                                                            | 4075001 | 4100000 | 40      | 0.00338066 | 0.00370063 | 0.00582645 |
| 167      | chr1                                                                            | 4100001 | 4125000 | 0       | 0.00375977 | 0.00383547 | 0.01018714 |

**Figure 1–Figure supplement 3. Preview of supplementary Table 2.** dk80 values for all genomic 25kb windows for the quartet [X]: Fra [Y]: Ger [Z]: Ira [O<sub>1</sub>]: CAS.

| 1   | dK80 values and total tree length for x (FRA), y(GER), z(IRA) and O(SPRE) |         |         |         |            |            |             |
|-----|---------------------------------------------------------------------------|---------|---------|---------|------------|------------|-------------|
| 2   | CHR                                                                       | START   | END     | MISSING | dK80_FRA   | dK80_GER   | TREELNGTH   |
| 151 | chr1                                                                      | 3700001 | 3725000 | 73      | 0.01075072 | 0.01182333 | 0.014129456 |
| 152 | chr1                                                                      | 3725001 | 3750000 | 99      | 0.01035236 | 0.01301701 | 0.017176465 |
| 153 | chr1                                                                      | 3750001 | 3775000 | 219     | 0.01969981 | 0.02024767 | 0.022397307 |
| 154 | chr1                                                                      | 3775001 | 3800000 | 447     | 0.01532601 | 0.01662267 | 0.024770115 |
| 155 | chr1                                                                      | 3800001 | 3825000 | 7859    | 0.0110984  | 0.01136991 | 0.018444923 |
| 156 | chr1                                                                      | 3825001 | 3850000 | 845     | 0.01531886 | 0.01547036 | 0.022584419 |
| 157 | chr1                                                                      | 3850001 | 3875000 | 62      | 0.0186267  | 0.01853943 | 0.020934784 |
| 158 | chr1                                                                      | 3875001 | 3900000 | 35      | 0.01369801 | 0.01368472 | 0.015527894 |
| 159 | chr1                                                                      | 3900001 | 3925000 | 91      | 0.01455824 | 0.01495146 | 0.017218374 |
| 160 | chr1                                                                      | 3925001 | 3950000 | 52      | 0.01576627 | 0.01531267 | 0.018615489 |
| 161 | chr1                                                                      | 3950001 | 3975000 | 174     | 0.01701792 | 0.01647532 | 0.017720405 |
| 162 | chr1                                                                      | 3975001 | 4000000 | 87      | 0.01690763 | 0.01726162 | 0.019451045 |
| 163 | chr1                                                                      | 4000001 | 4025000 | 88      | 0.01547185 | 0.01447689 | 0.018244756 |
| 164 | chr1                                                                      | 4025001 | 4050000 | 12      | 0.00933893 | 0.00820952 | 0.022272263 |
| 165 | chr1                                                                      | 4050001 | 4075000 | 240     | 0.01768169 | 0.01711415 | 0.02175166  |
| 166 | chr1                                                                      | 4075001 | 4100000 | 2184    | 0.01352769 | 0.01432316 | 0.016338947 |
| 167 | chr1                                                                      | 4100001 | 4125000 | 57      | 0.01441057 | 0.01463817 | 0.021437542 |

Figure 1-Figure supplement 4. Preview of supplementary Table 3. dK80 values for all genomic 25kb windows for the quartet [X]: Fra [Y]: Ger [Z]: Ira [O]: SPRE.

| outlier windows FRA in comparison to MUS, dK80 values and total tree length |          |          |         | outlier windows GER in comparison to MUS, dK80 values and total tree length |          |          |         | outlier windows IRA in comparison to MUS, dK80 values and total tree length |          |          |         |
|-----------------------------------------------------------------------------|----------|----------|---------|-----------------------------------------------------------------------------|----------|----------|---------|-----------------------------------------------------------------------------|----------|----------|---------|
| CHR                                                                         | START    | END      | MISSING | CHR                                                                         | START    | END      | MISSING | CHR                                                                         | START    | END      | MISSING |
| chr7                                                                        | 4765000  | 4787500  | 526     | chr11                                                                       | 7127500  | 7130000  | 2208    | chr1                                                                        | 7127500  | 7130000  | 1228    |
| chr1                                                                        | 14580000 | 14587500 | 107     | chr11                                                                       | 7125000  | 7120000  | 10946   | chr11                                                                       | 7125000  | 7120000  | 10946   |
| chr18                                                                       | 3727500  | 3730000  | 387     | chr11                                                                       | 7125000  | 7120000  | 6480    | chr11                                                                       | 7125000  | 7120000  | 6480    |
| chr4                                                                        | 5055000  | 5057500  | 897     | chr1                                                                        | 11875000 | 11870000 | 919     | chr1                                                                        | 11875000 | 11870000 | 919     |
| chr13                                                                       | 2017500  | 2020000  | 27      | chr10                                                                       | 4830000  | 4832500  | 1458    | chr7                                                                        | 10875000 | 10880000 | 107     |
| chr17                                                                       | 3622500  | 3625000  | 14      | chr7                                                                        | 10875000 | 10880000 | 107     | chr25                                                                       | 1785000  | 1787500  | 51      |
| chr13                                                                       | 6715000  | 6717500  | 215     | chr15                                                                       | 1765000  | 1767500  | 51      | chr10                                                                       | 4830000  | 4832500  | 1458    |
| chr8                                                                        | 5180000  | 5182500  | 79      | chr2                                                                        | 17687500 | 17690000 | 264     | chr2                                                                        | 17687500 | 17690000 | 264     |
| chr14                                                                       | 8865000  | 8867500  | 158     | chr9                                                                        | 3857500  | 3860000  | 101     | chr6                                                                        | 6207500  | 6210000  | 3       |
| chr7                                                                        | 8505000  | 8507500  | 1710    | chr6                                                                        | 6041500  | 6045000  | 302     | chr9                                                                        | 3887500  | 3890000  | 101     |
| chr16                                                                       | 1605000  | 1607500  | 181     | chr16                                                                       | 6207500  | 6210000  | 3       | chr6                                                                        | 6045000  | 6048000  | 302     |
| chr7                                                                        | 1042500  | 1045000  | 144     | chr5                                                                        | 8497500  | 8500000  | 71      | chr16                                                                       | 6485000  | 6488000  | 272     |
| chr1                                                                        | 14887500 | 14890000 | 190     | chr2                                                                        | 17625000 | 17627500 | 301     | chr5                                                                        | 8497500  | 8500000  | 71      |
| chr5                                                                        | 1133000  | 11335000 | 289     | chr11                                                                       | 8306000  | 8308500  | 28      | chr2                                                                        | 17625000 | 17627500 | 301     |
| chr5                                                                        | 5835000  | 5837500  | 186     | chr3                                                                        | 1132500  | 11335000 | 2746    | chr11                                                                       | 8306000  | 8308500  | 28      |
| chr7                                                                        | 802500   | 805000   | 363     | chr10                                                                       | 3560000  | 3562500  | 1       | chr13                                                                       | 8010000  | 8012500  | 17      |
| chr2                                                                        | 9735000  | 9737500  | 42      | chr2                                                                        | 9690000  | 9692500  | 106     | chr2                                                                        | 9690000  | 9692500  | 106     |
| chr3                                                                        | 11317500 | 11320000 | 1056    | chr6                                                                        | 6782500  | 6785000  | 35      | chr6                                                                        | 6037500  | 6040000  | 265     |
| chr1                                                                        | 1337000  | 1337500  | 123     | chr13                                                                       | 8007500  | 8010000  | 49      | chr13                                                                       | 8007500  | 8010000  | 49      |
| chr4                                                                        | 6820000  | 6822500  | 0       | chr6                                                                        | 6037500  | 6040000  | 265     | chr6                                                                        | 6782500  | 6785000  | 35      |
| chr5                                                                        | 6005000  | 6007500  | 906     | chr16                                                                       | 6482500  | 6485000  | 772     | chr1                                                                        | 10857500 | 10860000 | 1607    |
| chr14                                                                       | 8977500  | 8980000  | 52      | chr1                                                                        | 9657500  | 9660000  | 455     | chr1                                                                        | 9657500  | 9660000  | 455     |
| chr14                                                                       | 8977500  | 8977500  | 184     | chr6                                                                        | 6040000  | 6042500  | 279     | chr2                                                                        | 1387500  | 1390000  | 30      |
| chr18                                                                       | 5477500  | 5480000  | 83      | chr3                                                                        | 4487500  | 4490000  | 439     | chr6                                                                        | 6040000  | 6042500  | 279     |
| chr2                                                                        | 8737500  | 8740000  | 128     | chr2                                                                        | 1387500  | 1390000  | 30      | chr13                                                                       | 6687500  | 6690000  | 4203    |

Figure 1-Figure supplement 5. Preview of supplementary Table 4. Lists of outlier windows for the three quartet comparisons.

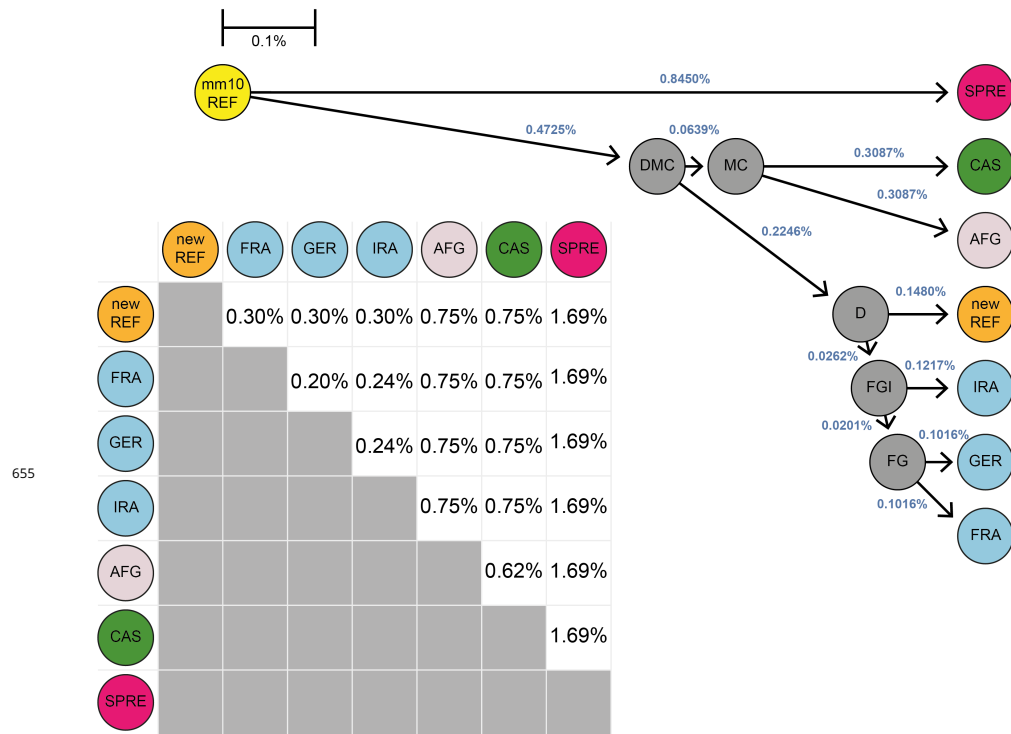

**Figure 1-Figure supplement 6. Scheme of the simulation approach.** Taking the mm10 reference sequence (yellow) as a start point, genomes were constructed in a phylogenetic context mimicking the real data including the construction of a 'new' reference (orange). Nucleotides were randomly altered given a percentage divergence value including ancestral states (grey). The resulting distances represents the phylogenetic context obtained as described in the method section.

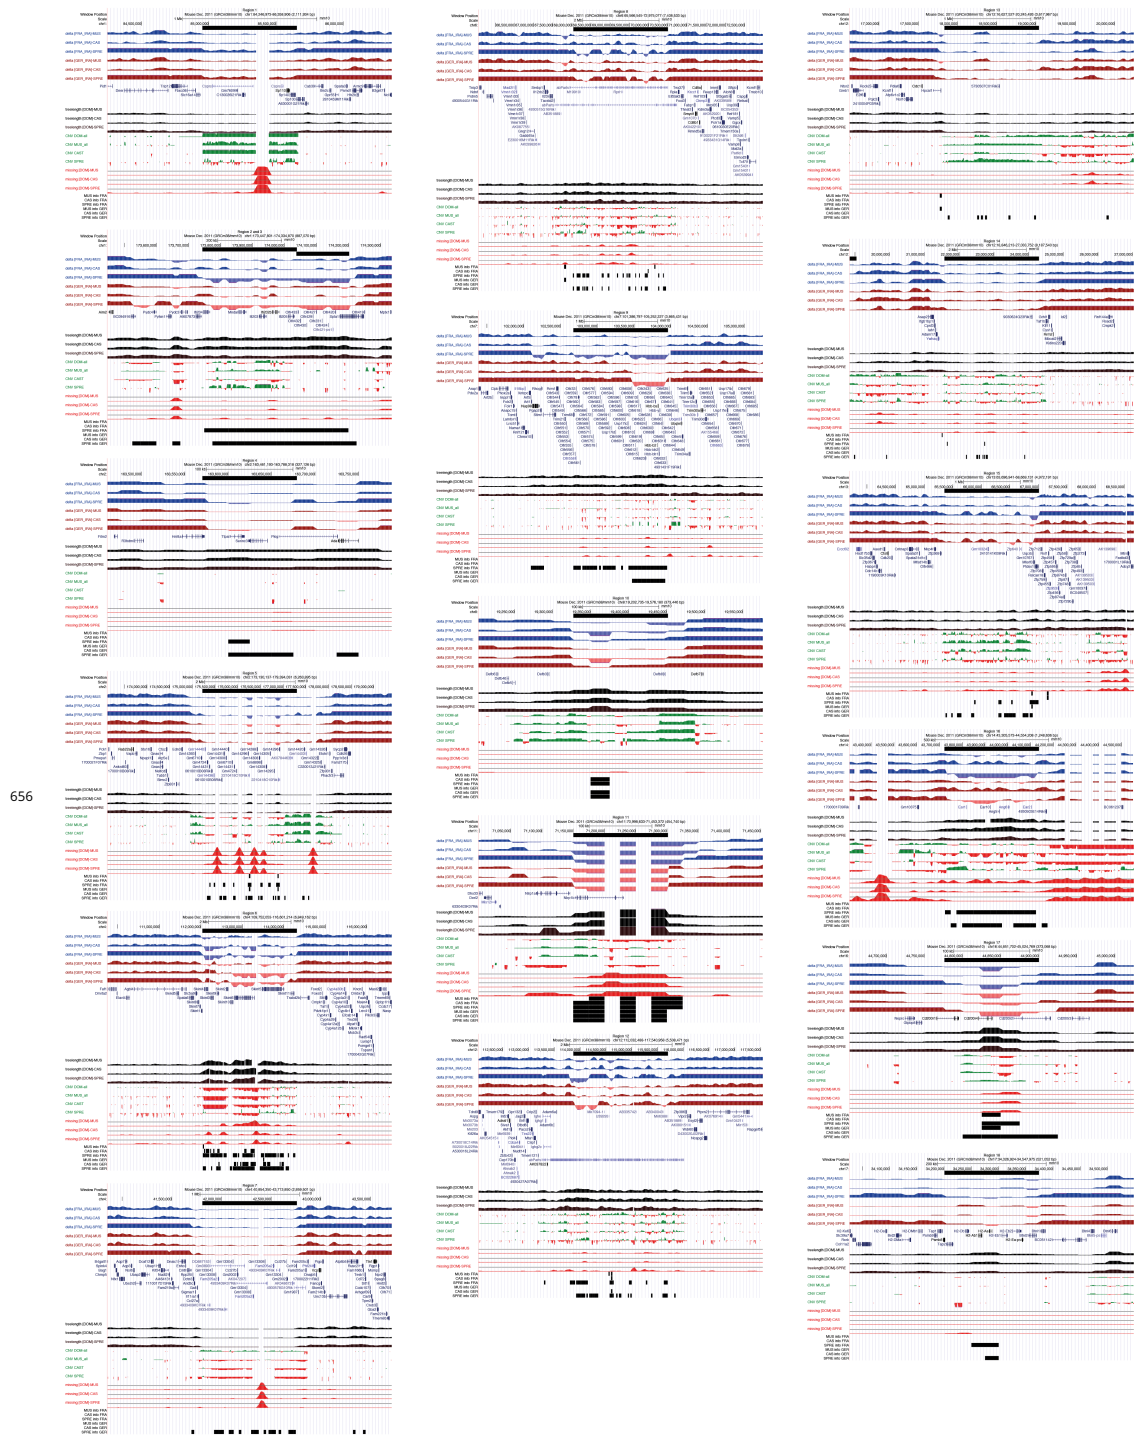

**Figure 4-Figure supplement 1. Collection of screen shots of browser windows for all mutual introgression regions listed in Table 2. For full track description see legend of Figure 2.**

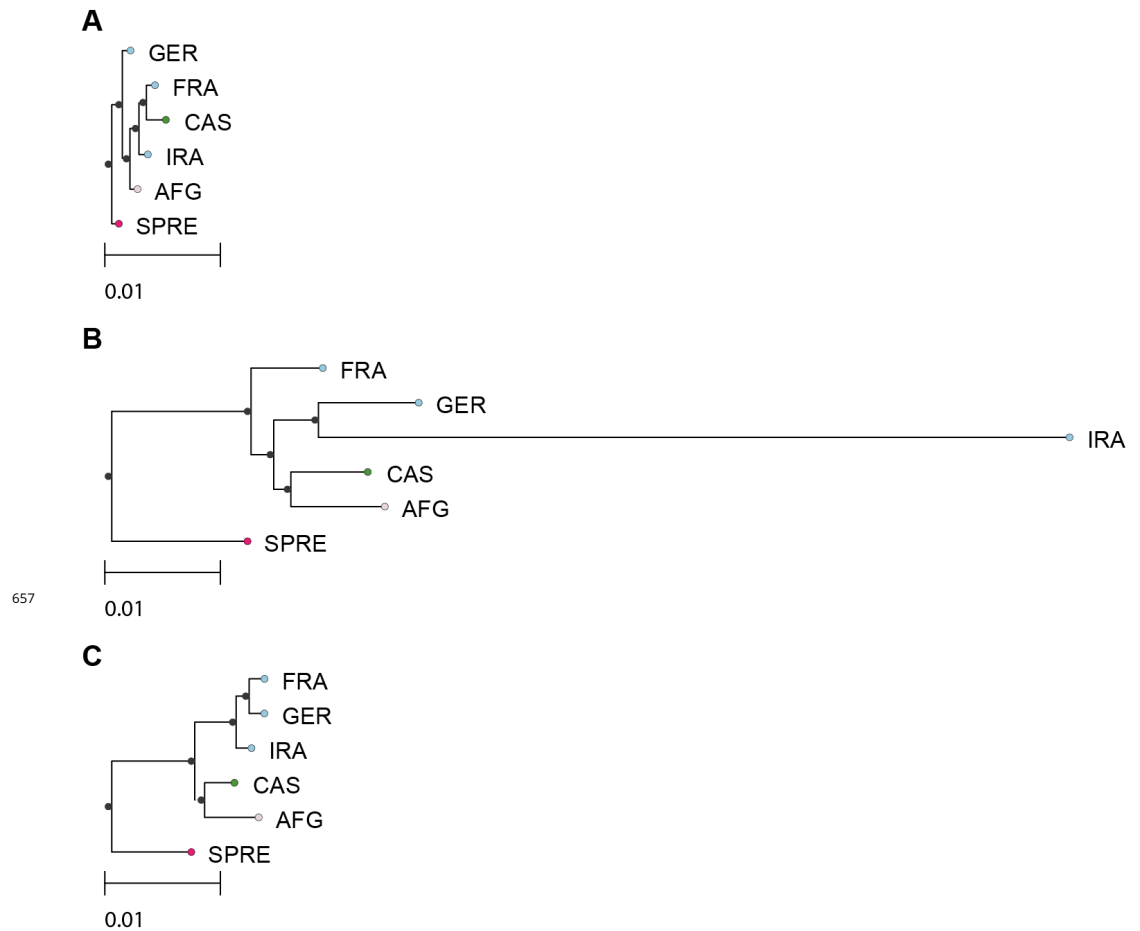

**Figure 4-Figure supplement 2. Neighbor-joining (NJ) tree comparisons with consensus sequences in extreme introgression regions.** (A) Region 11 from Table 2 (tree constructed for chr11:71,150,213-71,301,792) including *Nlrp1b*. (B) Region 7 from Table 2 (tree constructed for chr4:41,807,517-42,760,683) including a chemokine ligand cluster. (C) Standard tree structure represented by a tree of whole chr19. NJ (*Saitou and Nei, 1987*) trees based on pair-wise K80 distances (*Kimura, 1980*) with the R ape package (*Paradis et al., 2004*). Prior the NJ tree calculation all masked sites were removed from all included sequences.



|    | A                              | B                             | C         | D      | E           | F                   | G                                                               | H                      |
|----|--------------------------------|-------------------------------|-----------|--------|-------------|---------------------|-----------------------------------------------------------------|------------------------|
| 1  | overlap with regions in Table2 | genomic position              | size (MB) | dk80   | tree length | significant windows | annotated coding genes                                          | general classification |
| 2  |                                | chr1:116,581,664-117,036,128  | 0.45      | -3.99  | 12.94       | yes                 | none                                                            | non-coding             |
| 3  | 2                              | chr1:173,615,452-174,039,180  | 0.42      | 0.37   | 17.85       | yes                 | Pyhin1, Pycd3, Al607673, Ifi204, Mndal, Ifi203, Ifi202b, Ifi205 | immunity (innate)      |
| 4  | 3                              | chr1:174,036,870-174,202,341  | 0.17      | 0.39   | 26.04       | yes                 | Olfir receptor cluster                                          | sensory                |
| 5  |                                | chr1:49,248,596-49,400,827    | 0.15      | -0.62  | 9.99        | no                  | C230029F24Rik                                                   | unknown                |
| 6  | 1                              | chr1:84,950,951-85,654,928    | 0.7       | 1.01   | 2.80        | no                  | Csprs, Sp110, Sp140                                             | immunity (innate)      |
| 7  |                                | chr2:126,649,041-126,777,659  | 0.13      | 0.31   | 8.44        | no                  | Usp8                                                            | immunity (adaptive)    |
| 8  | 4                              | chr2:163,570,927-163,750,004  | 0.18      | 0.15   | 17.60       | yes                 | Ttpal, Serinc3, Pkig                                            | immunity (adaptive)    |
| 9  | 5                              | chr2:174,938,301-177,965,862  | 3.03      | -0.02  | 2.67        | yes                 | cluster of ZF-C2H2 predicted proteins                           | immunity (transposon)  |
| 10 |                                | chr2:77,872,657-78,026,277    | 0.15      | 8.31   | 9.32        | yes                 | CWC22                                                           | meiotic drive          |
| 11 |                                | chr3:105,996,817-106,452,618  | 0.46      | 0.04   | 4.75        | no                  | Pifo and Chl3 - gene cluster                                    | immunity (innate)      |
| 12 |                                | chr3:112,991,969-113,581,063  | 0.59      | -2.91  | 16.26       | yes                 | amylase gene cluster                                            | metabolism             |
| 13 |                                | chr3:134,000,770-134,100,665  | 0.1       | -3.38  | 10.80       | yes                 | none                                                            | non-coding             |
| 14 |                                | chr3:144,725,770-145,097,656  | 0.37      | 1.52   | 13.74       | yes                 | Cla gene cluster                                                | immunity (innate)      |
| 15 |                                | chr3:48,847,480-49,123,658    | 0.28      | 0.32   | 9.57        | yes                 | none                                                            | non-coding             |
| 16 |                                | chr3:92,224,164-92,375,422    | 0.15      | -2.37  | 11.70       | no                  | Sprr gene cluster                                               | immunity (innate)      |
| 17 | 6                              | chr4:112,035,107-114,318,160  | 2.28      | -1.63  | 26.70       | yes                 | Skint gene cluster                                              | immunity (adaptive)    |
| 18 |                                | chr4:145,437,109-147,825,549  | 2.38      | 0.56   | 5.53        | no                  | cluster of ZF-C2H2 predicted proteins                           | immunity (transposon)  |
| 19 | 7                              | chr4:41,807,517-42,760,683    | 0.95      | 0.18   | 1.21        | yes                 | Ccl - chemokine ligand gene cluster                             | immunity (adaptive)    |
| 20 |                                | chr4:59,945,328-62,187,387    | 2.24      | 1.91   | 3.78        | no                  | MUP gene cluster                                                | pheromone              |
| 21 |                                | chr5:104,450,295-104,701,942  | 0.25      | -0.82  | 10.73       | yes                 | Pkd2, BCO05561, AK049668                                        | metabolism             |
| 22 |                                | chr5:109,000,917-109,476,050  | 0.47      | 0.98   | 5.61        | yes                 | vomeranase receptor cluster                                     | sensory                |
| 23 |                                | chr5:109,500,815-109,604,610  | 0.1       | -1.95  | 10.58       | yes                 | Crf2                                                            | immunity (adaptive)    |
| 24 |                                | chr5:109,819,062-110,070,047  | 0.25      | -1.40  | 12.20       | no                  | Zfp932                                                          | regulatory             |
| 25 |                                | chr5:14,904,297-15,721,130    | 0.82      | 2.15   | 6.20        | no                  | Takusan domain gene cluster                                     | testis                 |
| 26 |                                | chr5:8,172,153-8,329,824      | 0.16      | -1.31  | 8.19        | no                  | Adam22 (partial)                                                | unknown                |
| 27 |                                | chr5:93,448,126-95,827,540    | 2.38      | 0.96   | 1.55        | no                  | cluster of predicted genes                                      | unknown                |
| 28 |                                | chr6:131,023,045-131,276,322  | 0.25      | -0.33  | 6.68        | no                  | Kira2                                                           | immunity (adaptive)    |
| 29 |                                | chr6:60,348,275-60,452,556    | 0.1       | -10.10 | 31.29       | yes                 | none                                                            | non-coding             |
| 30 | 8                              | chr6:68,036,056-70,505,566    | 2.47      | 1.54   | 15.96       | yes                 | abParts                                                         | immunity (adaptive)    |
| 31 |                                | chr7:102,099,272-102,276,909  | 0.18      | 1.79   | 14.84       | yes                 | Chrna10, Nup98, Pgap2, Rhog                                     | immunity (innate)      |
| 32 | 9                              | chr7:102,472,207-103,966,610  | 1.49      | 0.88   | 15.79       | yes                 | Olfir receptor cluster, Hbb genes                               | sensory                |
| 33 |                                | chr7:105,869,048-106,584,033  | 0.72      | 0.26   | 6.64        | yes                 | Gwin1 gene cluster                                              | immunity (adaptive)    |
| 34 |                                | chr7:107,968,504-108,106,027  | 0.14      | -0.84  | 10.34       | yes                 | Olfir receptor cluster                                          | sensory                |
| 35 |                                | chr7:20,013,374-23,334,034    | 3.32      | 1.63   | 3.05        | no                  | vomeranase receptor cluster                                     | sensory                |
| 36 |                                | chr7:48,146,207-48,278,851    | 0.13      | -3.58  | 16.35       | yes                 | Mrgprb4, Mrgpr5                                                 | sensory                |
| 37 | 10                             | chr8:19,327,217-19,451,698    | 0.12      | -3.77  | 25.19       | yes                 | Defb8                                                           | immunity (innate)      |
| 38 |                                | chr8:19,676,960-20,814,514    | 1.14      | 1.88   | 3.29        | no                  | predicted genes                                                 | unknown                |
| 39 |                                | chr8:24,627,009-24,885,472    | 0.26      | 0.76   | 5.84        | no                  | ADAM gene family                                                | testis                 |
| 40 |                                | chr10:129,673,649-129,776,654 | 0.1       | -2.73  | 9.56        | yes                 | Olfir receptor cluster                                          | sensory                |
| 41 |                                | chr10:81,700,894-81,975,827   | 0.27      | 0.86   | 4.29        | no                  | cluster of ZF-C2H2 predicted proteins                           | immunity (transposon)  |
| 42 |                                | chr11:54,494,130-54,704,357   | 0.21      | 1.55   | 2.93        | no                  | Rapgef6                                                         | metabolism             |
| 43 | 11                             | chr11:71,142,650-71,347,510   | 0.2       | -26.17 | 44.11       | yes                 | Nlrp1b                                                          | immunity (innate)      |
| 44 |                                | chr11:82,942,065-83,247,359   | 0.3       | -0.04  | 7.14        | yes                 | Sifn gene cluster                                               | immunity (adaptive)    |
| 45 | 12                             | chr12:113,866,694-115,905,783 | 2.03      | 0.89   | 18.74       | yes                 | abParts                                                         | immunity (adaptive)    |
| 46 | 13                             | chr12:17,833,516-19,039,504   | 1.2       | 0.83   | 3.29        | yes                 | 5730507C01Rik                                                   | immunity (transposon)  |
| 47 | 14                             | chr12:21,575,393-24,304,572   | 2.73      | 1.33   | 4.85        | yes                 | 9030624G23Rik                                                   | unknown                |
| 48 |                                | chr12:37,121,276-37,252,097   | 0.13      | -1.32  | 9.58        | no                  | Meox2, Agmo (both partial)                                      | regulatory             |
| 49 |                                | chr13:33,206,250-34,004,632   | 0.8       | -0.45  | 10.68       | yes                 | Serpinb gene cluster, NQO2                                      | immunity (adaptive)    |
| 50 | 15                             | chr13:65,354,338-67,011,734   | 1.7       | 1.05   | 8.66        | yes                 | cluster of ZF-C2H2 predicted proteins                           | immunity (transposon)  |
| 51 |                                | chr13:85,949,160-86,052,577   | 0.1       | -3.22  | 16.97       | no                  | Cox7c                                                           | metabolism             |
| 52 |                                | chr14:19,467,178-19,606,600   | 0.14      | 1.09   | 1.56        | no                  | Takusan domain gene cluster                                     | testis                 |
| 53 |                                | chr14:3,052,032-7,785,533     | 4.73      | 1.70   | 2.67        | no                  | Takusan domain gene cluster                                     | testis                 |
| 54 |                                | chr14:41,224,160-43,667,865   | 2.44      | 2.26   | 4.60        | no                  | Takusan domain gene cluster                                     | testis                 |
| 55 | 16                             | chr14:43,721,785-44,137,996   | 0.42      | 2.33   | 23.56       | yes                 | Ear gene family                                                 | immunity (innate)      |
| 56 | 17                             | chr16:44,776,058-44,900,413   | 0.12      | -3.68  | 25.54       | yes                 | Cd200r genes                                                    | immunity (innate)      |
| 57 |                                | chr16:48,919,828-49,078,537   | 0.16      | -0.20  | 5.49        | no                  | Dzip3, Cip2a                                                    | immunity (adaptive)    |
| 58 |                                | chr16:56,922,954-57,099,170   | 0.18      | -1.75  | 10.41       | yes                 | Tmem45a2                                                        | unknown                |
| 59 |                                | chr16:61,970,281-62,128,764   | 0.16      | -2.63  | 14.68       | yes                 | none                                                            | non-coding             |
| 60 |                                | chr17:27,122,393-27,373,816   | 0.25      | 0.05   | 7.45        | no                  | Uqcc2, Ip6k3, Lemd2, Gm10505                                    | metabolism             |
| 61 | 18                             | chr17:33,407,557-36,293,253   | 2.89      | 1.06   | 7.33        | yes                 | extended MHC region                                             | immunity (adaptive)    |
| 62 |                                | chr17:37,574,925-37,853,356   | 0.28      | 0.55   | 5.51        | no                  | Olfir receptor cluster                                          | sensory                |
| 63 |                                | chr17:57,423,660-57,552,843   | 0.13      | -2.55  | 8.10        | yes                 | Adgre1 (partial), Vmn2r120                                      | immunity (adaptive)    |
| 64 |                                | chr19:12,922,815-13,051,570   | 0.13      | -0.77  | 9.95        | no                  | Olfir receptor cluster                                          | sensory                |
| 65 |                                | chrX:27,201,903-30,998,527    | 3.8       | 1.27   | 1.47        | no                  | Slx gene cluster                                                | testis                 |
| 66 |                                | chrX:3,181,827-4,950,229      | 1.8       | 1.48   | 2.48        | no                  | BTB domain predicted protein cluster                            | testis                 |
| 67 |                                | chrX:31,217,092-34,617,228    | 3.4       | 1.98   | 2.61        | no                  | BTB domain and Spindlin predicted protein cluster               | testis                 |
| 68 |                                | chrX:81,098,297-81,276,935    | 0.18      | -1.24  | 10.18       | no                  | none                                                            | non-coding             |

**Figure 4–Figure supplement 3. Preview of suppl. Table 5.** This table represents an extended version of Table 2 including all identified introgression regions between subspecies and species, as well as the respective genomic locations.
